# Supplementary material for: A single Na+-Pi cotransporter in Toxoplasma plays key roles in phosphate import and control of parasite osmoregulation
Source: PubMed Central journal article supplement (PMC7817038; doi:10.1371/journal.ppat.1009067), 2020-12-31
Supplement: ppat.1009067.s001.pdf [file ppat.1009067.s001.pdf]

|                |                                                                    |     |
|----------------|--------------------------------------------------------------------|-----|
| <b>ScPHO89</b> | -----MALHQFDYIFAIALMFLAFLDAFNIGANDVANSFASSISSRSLKYWQA              | 47  |
| <b>TgPiT</b>   | MEAVAELSAPSLAGAPGEYTWIVAVAGVTCFLTAFAIGANDVANTFSSSVGSRAIPLWAA       | 60  |
| <b>PfPiT</b>   | -----MVTGPDMLLWLVIITSGIACFFMAFVTGANDIANTFSTSIGSKAISIKKA            | 48  |
|                | :  :  :..  :  :  .*:  **  ****:*:*:*:*:*:*:*:  *  *                |     |
| <b>ScPHO89</b> | MVLAGLCEFLGAVLAGARVSGTIKNNIIDSSIFTNDPAVLMMLTMTSALIGSSCWLTFATA      | 107 |
| <b>TgPiT</b>   | IGMSAVLETVGATLLGGAVTDSIRSKIIDFEVFRETGPSILMTGMLCALVGAGLWLFNLH       | 120 |
| <b>PfPiT</b>   | LIVAFFFEALGASLLGGTVDTSIRSKIIINFQVFYDTPFLMLGMCCALMGATVWLAVATR       | 108 |
|                | :  :  .  *  :*  *  *  *:  *:  *:  *:  *:  *:  *:  *:  *  *  *      |     |
| <b>ScPHO89</b> | IGMPVSTTHSIVGGTIGAGIAAGGANGVVGWWSGVSQIIASWFIAPILAGAIAAIVFSIS       | 167 |
| <b>TgPiT</b>   | LGLPVSTTHSIIGALLGFGLASGNVRAVK--WTQVAFIVGSWVAAPLAASAAGATIFVCM       | 178 |
| <b>PfPiT</b>   | AGLPVSTTHSIIGALLGFGLATGNMKSII--WEKINNIVISWLAAPILAGTCSAIAFTVL       | 166 |
|                | *:*****:*  .*  :*  *:  *:  *  ..:  *  :  *:  **  **:*  *  .:  *  * |     |
| <b>ScPHO89</b> | RFSVLEVKSLERSIKNALLLVGVLVFATFSILTM---LIVWK-----GSPNLHL---          | 213 |
| <b>TgPiT</b>   | RRLILRSRQPLRRAKRFLWIFIYLLITLTFVFLVFKNFFELNVSCDQMVAGGRVEHFEP        | 238 |
| <b>PfPiT</b>   | RMLILRKKNSFEI IKMYWFLIFLITLPFSVFLIFHNPIVINTQCKM-KKDGKVIIVSSPC      | 225 |
|                | *  :*  .:  .  *  .:  *:  **::  :  :  :  :  ..                      |     |
| <b>ScPHO89</b> | --DDLSE----TET----AVSIVLTGAASIVYFIFFFYPFYRRKVLVDQDWT----LKLIDI     | 259 |
| <b>TgPiT</b>   | RISRWADAHSGTALGIAVALSVALTFVISC--LVYRFAFYRVESYRRRQKRSSRTEPRDA       | 296 |

|                |                                                                          |     |
|----------------|--------------------------------------------------------------------------|-----|
| <b>ScPHO89</b> | IHAQVNDRDMLSGDLKGM-YERSKFYDNRVEYIYSVLQAITAATMSFAHGANDVANATGP             | 428 |
| <b>TgPiT</b>   | -----HAEGSTEDDLVARLQTGAEVFDTELEFFSACQVVSACMGCIAHSANDTANAIGP              | 701 |
| <b>PfPiT</b>   | -----NGKGG---DPKNMENVIIENFDPQTEIVFSSLQIISAILGVVAQSANDTANAIGP             | 485 |
|                | :  ..  *                  :  :*  ..*  .:*  *  ::*  *:*  **.*  **  **  ** |     |
| <b>ScPHO89</b> | LSAVYVIWKTNTIGAKSEVPVWVLAYGGVALVIGCWTYGYNIIKNLGNKMILQSPSRGFS             | 488 |
| <b>TgPiT</b>   | FAAILTVYQSGSADSEIGSPWYILLFGGLSMSLGLLALLGYRVIKTVGVKLVKITPARGFS            | 761 |
| <b>PfPiT</b>   | FAAVFNTYNNGIR-GKIKVQWYILLFGGLSMSLGLSIMGYRVIKTVGMKLIKITPARGFT             | 544 |
|                | ::*:  :..  .:          ::*  *:  *:  *:  *  **  .:**  .:*  *  .:  *:  **: |     |
| <b>ScPHO89</b> | IELAVAITTVMATQLGIPTSTTQIAVGGIVAVGLCNKD-----                              | 526 |
| <b>TgPiT</b>   | MELGAAWTVLIFSAIGIPLSTTHCAVGSTVGVGLMEPKHPRRETGDGP-----VAEGEE              | 815 |
| <b>PfPiT</b>   | IELISGLVVLFFSICGIPLSSTHCAVSSVIGLGLVEAKMNADNKRHARKSMDKDIIQVDK             | 604 |
|                | :**  .  ..::  :  ***  *:  *:  **..  .:**  :  .                           |     |
| <b>ScPHO89</b> | -----LKSVNWRMVAWCYSGWFLTLPIAGLIAGIINGIILNAPRFGV                          | 568 |
| <b>TgPiT</b>   | -----PKKRAVQCPVINTASVNWKLFGGVFVSWIITIAFSALVTAALFSFAAYSP----              | 865 |
| <b>PfPiT</b>   | DKSFTLLEKIKYPFSFLNTSCVNLRLFRVFLSWILTUVFSATVTAGIYSFAAYSPSYIM              | 664 |
|                | .**  :..  :  .*:  *:  :..  :..  :  .:  *  *                              |     |
| <b>ScPHO89</b> | EYQMT          573                                                       |     |
| <b>TgPiT</b>   | VS---          865                                                       |     |
| <b>PfPiT</b>   | KMQTV          669                                                       |     |

**S1 Fig.** Alignments of N-terminal and C-terminal sequences of TgPiT with ScPHO89 and PfPiT, showing the conserved glutamic residues (in green) in TgPiT for P<sub>i</sub> import.
