# Supplementary material for: A single Na+-Pi cotransporter in Toxoplasma plays key roles in phosphate import and control of parasite osmoregulation
Source: PubMed Central journal article supplement (PMC7817038; doi:10.1371/journal.ppat.1009067), 2020-12-31
Supplement: ppat.1009067.s003.pdf [file ppat.1009067.s003.pdf]

**A**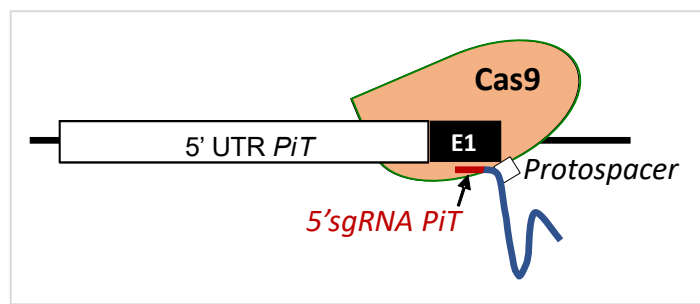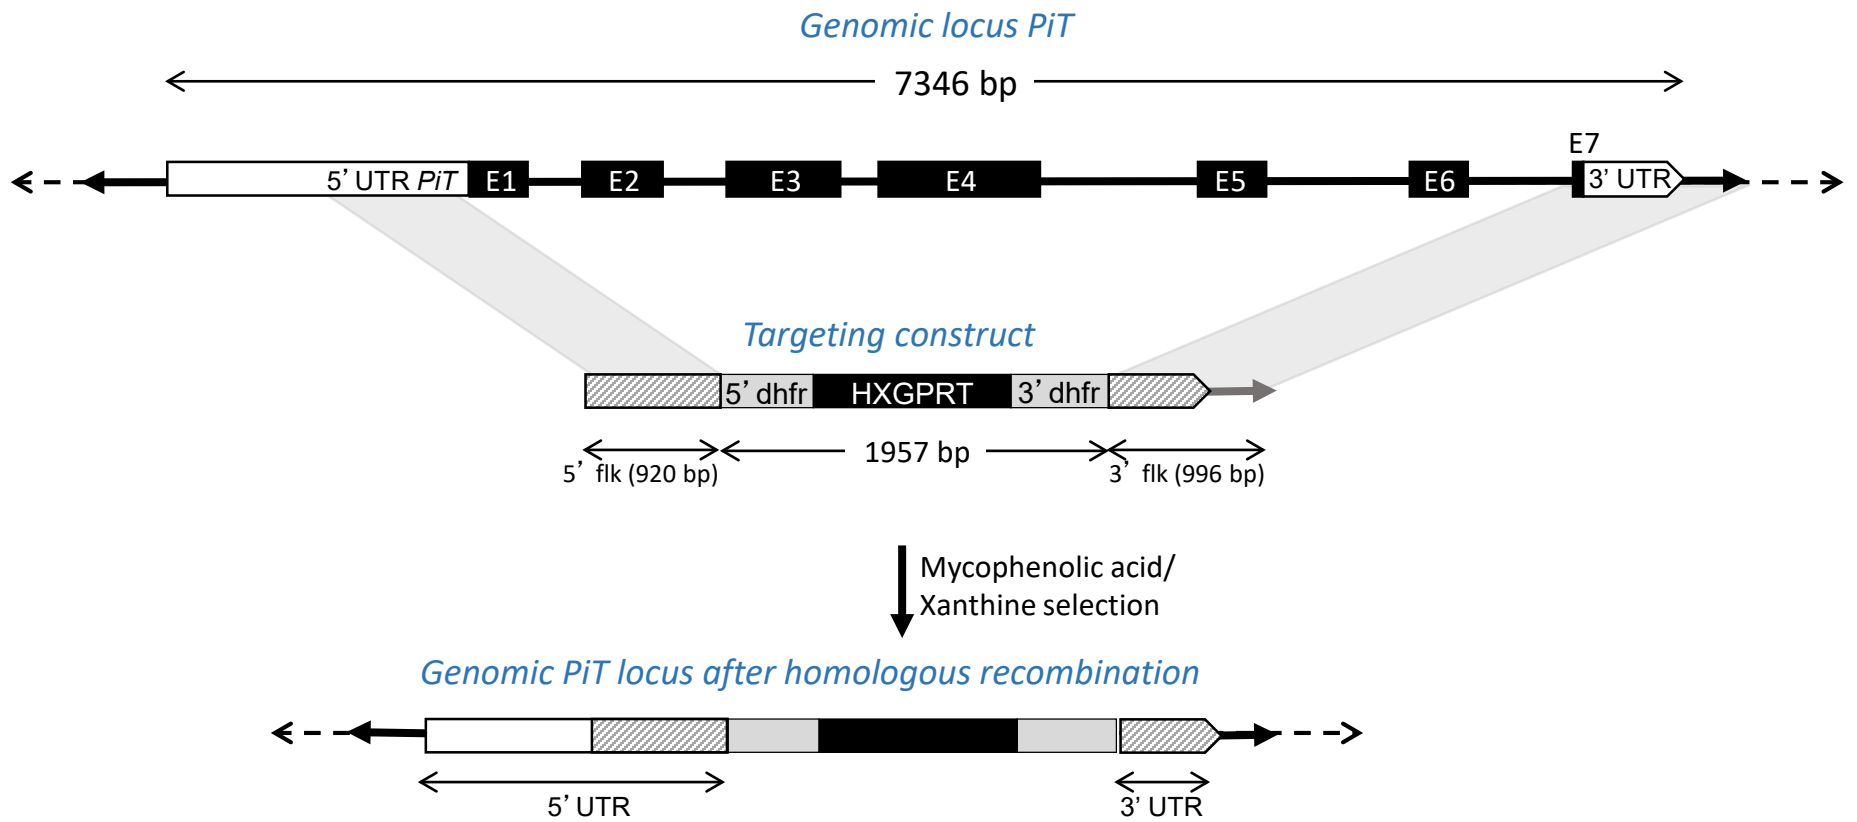**B**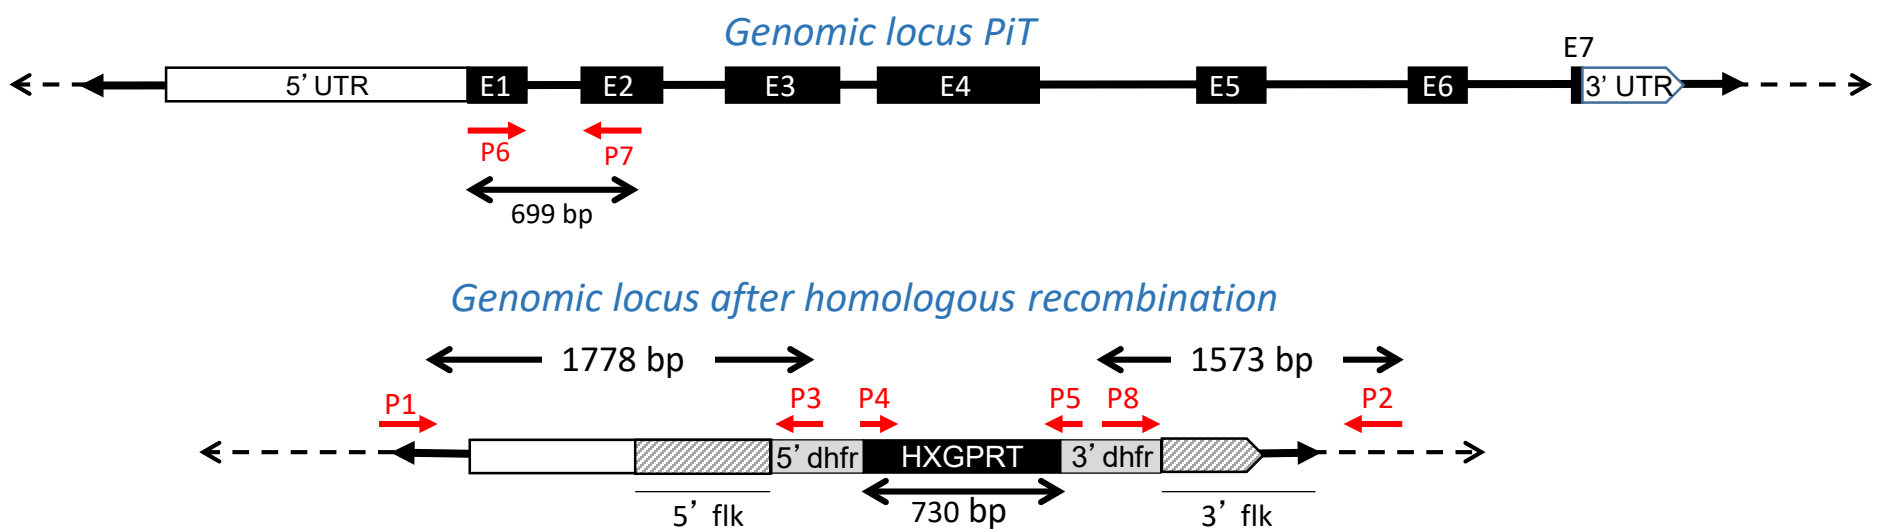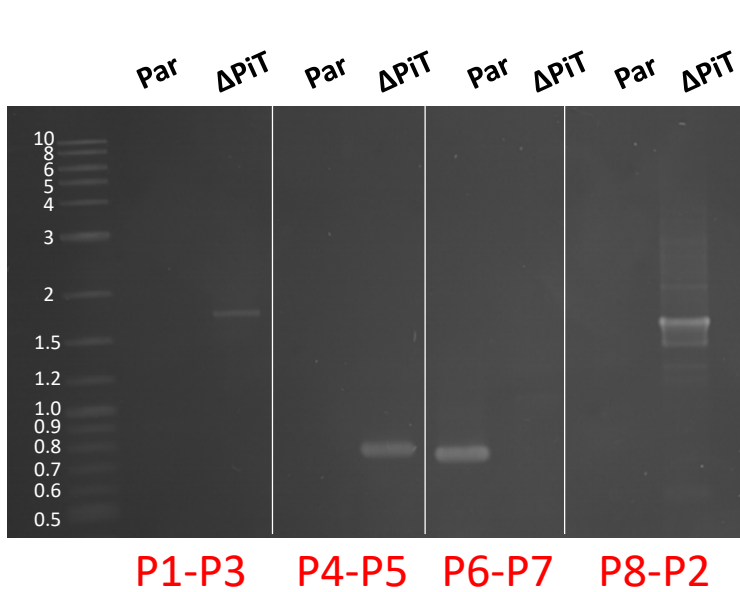**C**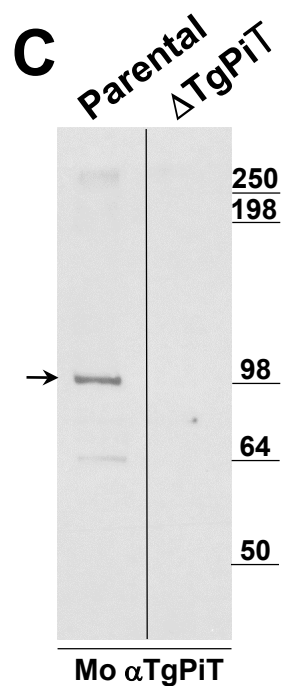**D**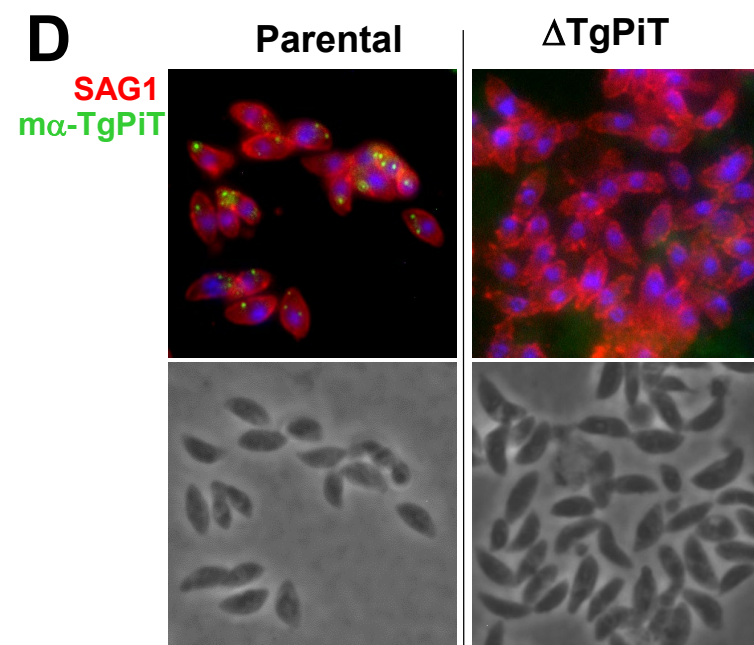

**S3 Fig. Strategy for PiT deletion and verification**
