# Supplementary material for: A single Na+-Pi cotransporter in Toxoplasma plays key roles in phosphate import and control of parasite osmoregulation
Source: PubMed Central journal article supplement (PMC7817038; doi:10.1371/journal.ppat.1009067), 2020-12-31
Supplement: ppat.1009067.s004.pdf [file ppat.1009067.s004.pdf]

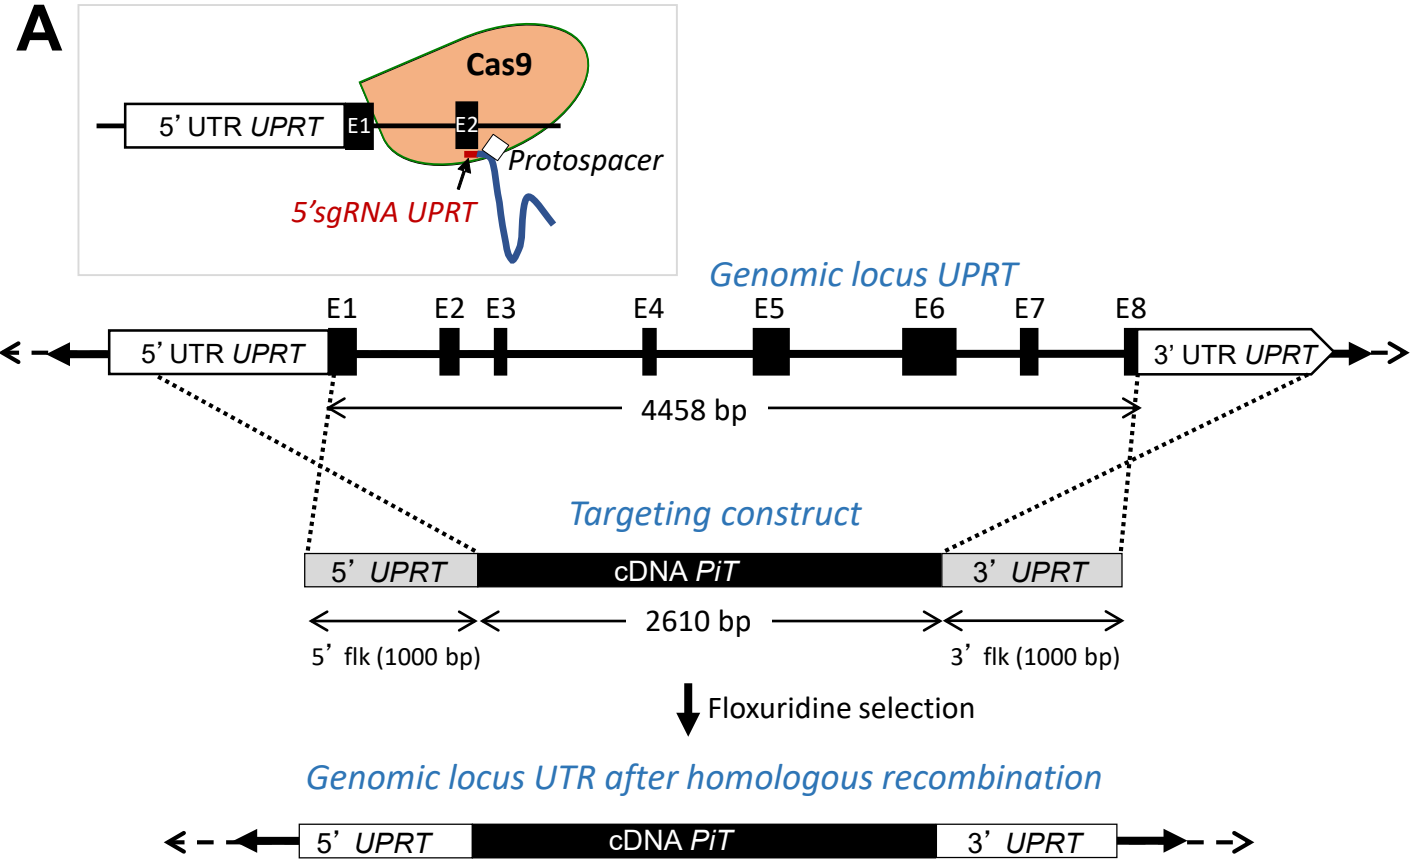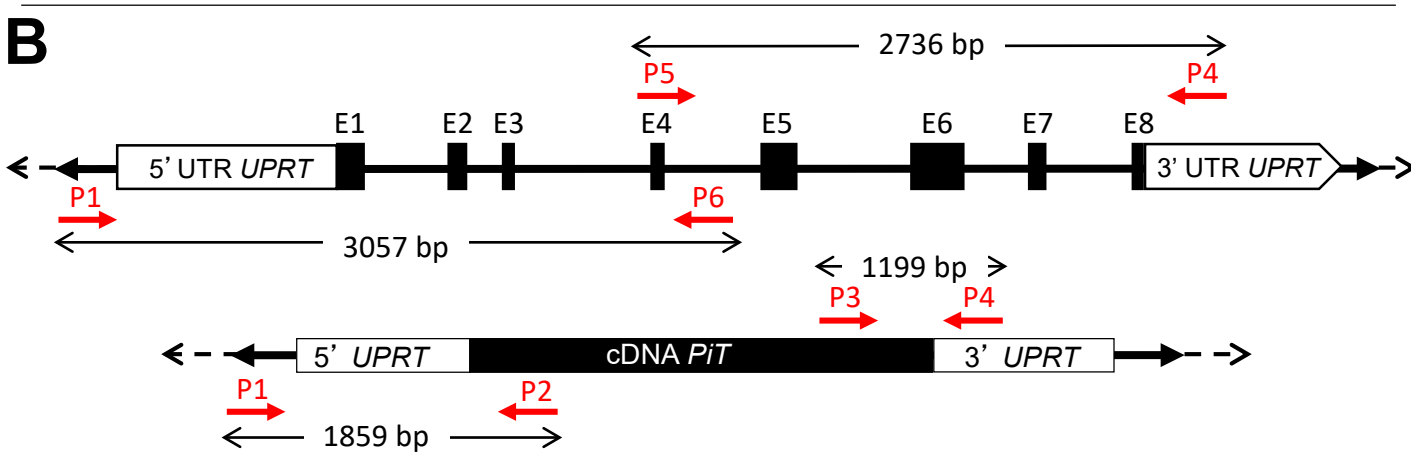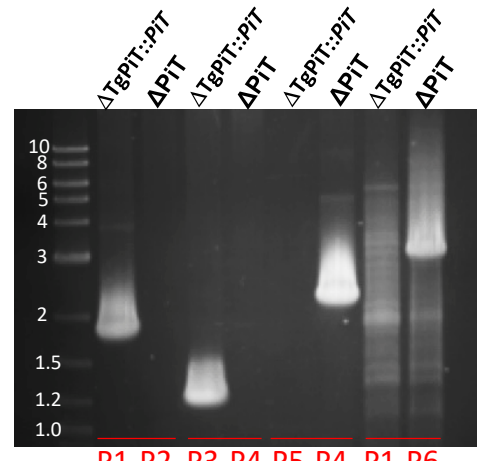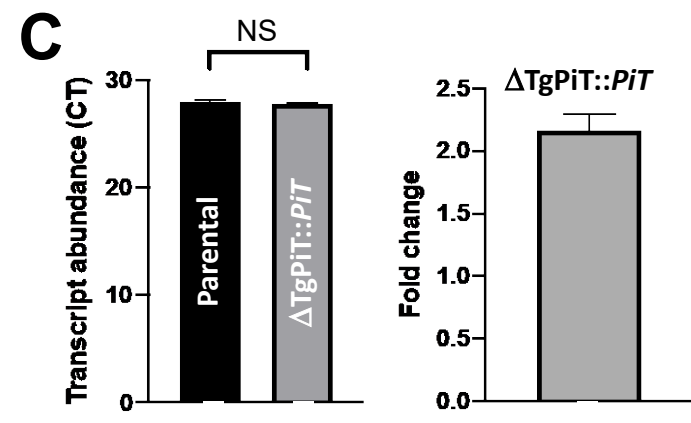

**S4 Fig. Strategy for complementation of  $\Delta$ TgPiT parasites and verification**
