# Supplementary material for: A single Na+-Pi cotransporter in Toxoplasma plays key roles in phosphate import and control of parasite osmoregulation
Source: PubMed Central journal article supplement (PMC7817038; doi:10.1371/journal.ppat.1009067), 2020-12-31
Supplement: ppat.1009067.s006.pdf [file ppat.1009067.s006.pdf]

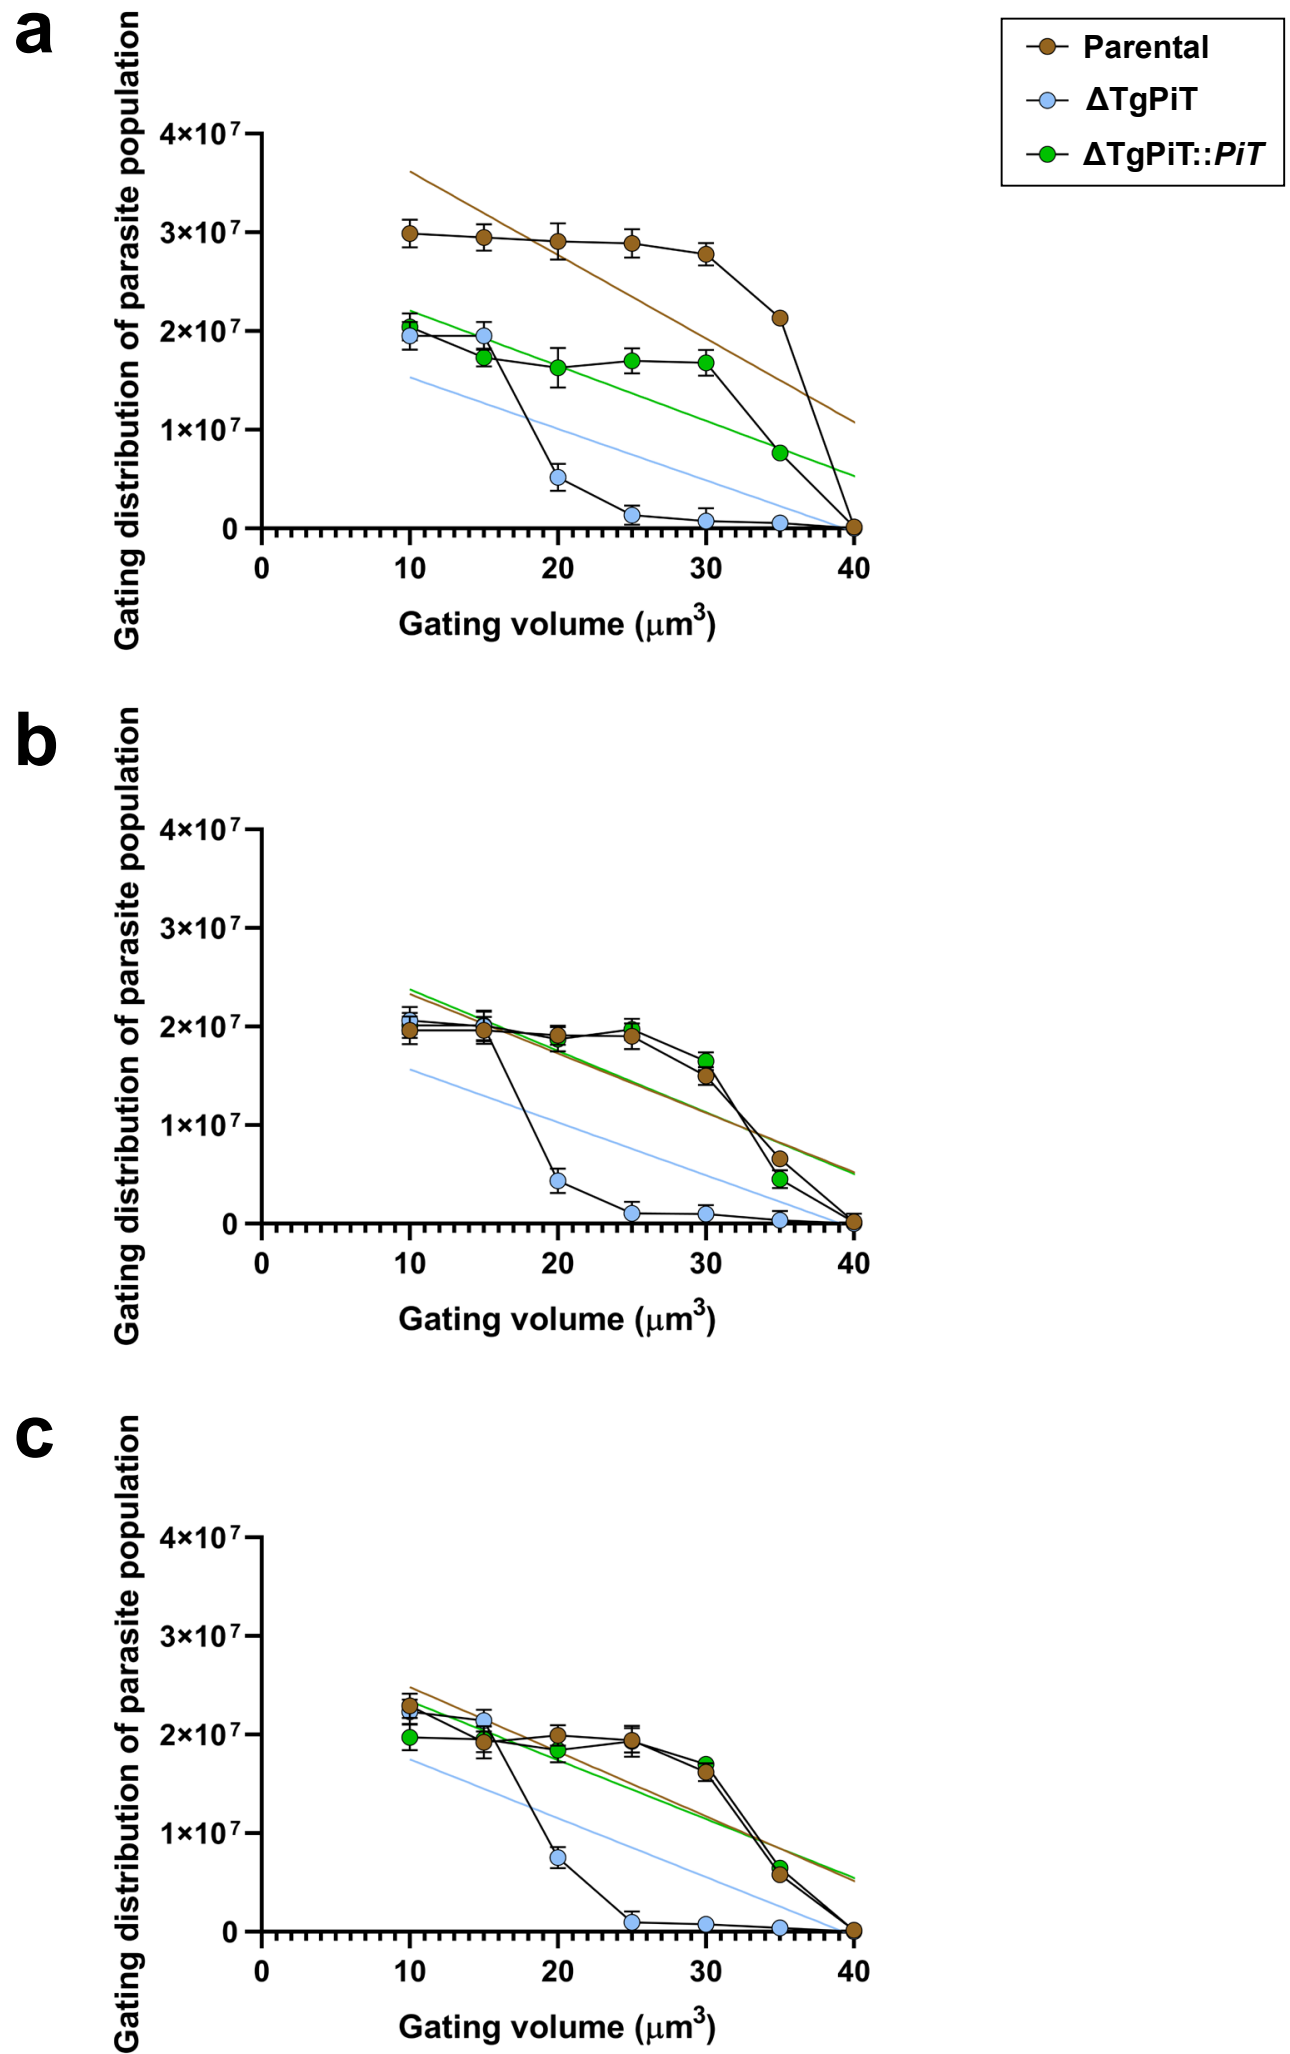

**S6 Fig.** Generation of the standard curves used to determine the cell volume for parental,  $\Delta\text{TgPiT}$  and  $\Delta\text{TgPiT}::\text{PiT}$  parasites using a Coulter counter
