# Supplementary material for: A single Na+-Pi cotransporter in Toxoplasma plays key roles in phosphate import and control of parasite osmoregulation
Source: PubMed Central journal article supplement (PMC7817038; doi:10.1371/journal.ppat.1009067), 2020-12-31
Supplement: ppat.1009067.s007.pdf [file ppat.1009067.s007.pdf]

| Name                                                                      | Sequence 5' to 3' (restriction sites in bold)              |
|---------------------------------------------------------------------------|------------------------------------------------------------|
| FTgPiTUTR                                                                 | TTT TGC CCT TCT GCG TCT TCT CTT ACC GAC ACA GT             |
| RTgPiTUTR                                                                 | ACG CTC ACA CGG CCT AAA ACC TCA CAC CCT TAA AT             |
| FTgPiTpTUB                                                                | TAT <b>AGA TCT</b> ATG GAG GCG GTT GCT GAG                 |
| RTgPiTpTUB                                                                | TAT <b>CCT AGG</b> GGA GAC CAT GCG AGG GGA GTA GGC CGC     |
| FPiTantiPep1                                                              | CCG <b>GGT ACC</b> CCT TCT ACC GCG TGG AGA GCT A           |
| RPiTantiPep1                                                              | <b>CCT AGG</b> TTA TGC ATC TTC AGC TAA ACT TCG AG          |
| FPiTantiPep2                                                              | ATA <b>GGA TCC</b> CGC GTG GAG AGC TAC CGG CGT             |
| RPiTantiPep2                                                              | ATT <b>AAG CTT</b> TTA GCC CCC GGG TCG CGC GTG TGA         |
| FqPCRTgPiT1                                                               | TTC AAG GAC ATC CAC GCT G                                  |
| RqPCRTgPiT1                                                               | GTC TCC GTG TCA AAT ACC TCG                                |
| FqPCRTgPiT2                                                               | AAC ATG AGC TGC GAC CAG                                    |
| RqPCRTgPiT2                                                               | AGG CAG GAA ATG ACG AAG G                                  |
| F $\alpha$ -actin                                                         | CCC GAT GGC AAC ATC ATC AC                                 |
| R $\alpha$ -actin                                                         | AAT GCC CTC GTA CAT AGT                                    |
| Q5(F)129                                                                  | AGC AGT TCG GGT TTT AGA GCT AGA AAT AGC                    |
| Q5(R)129                                                                  | GAA CGT ATT CAA CTT GAC ATC CCC ATT TAC                    |
| F5'PiTKpnl                                                                | ATA <b>GGT ACC</b> CTT CCT TTC TCT CAC TTC GTC TTC TTC CTC |
| R5'PiTXhol                                                                | GCG <b>CTG GAG</b> TAA CTA GGT ATA TAC AAA TAA ATT GGT AAT |
| F3'PiTBamHI                                                               | ATA <b>GGA TCC</b> GAG TTG TCA TTC AAC TCT CCA CGC TCA CCA |
| R3'PiTXbal                                                                | GCG <b>TCT AGA</b> TTC GAT TTA AGA TGC ACC AGT AAA AGA     |
| 5'UPRTfwd                                                                 | TGC CTG CAG GTT TTT CTG TTT TTC CTG C                      |
| 5'UPRTrev                                                                 | CCG CCT CCA TTT TAG AAG CCC TGT GGA AAG                    |
| PiTeDNafwd                                                                | GGC TTC TAA AAT GGA GGC GGT TGCTGA G                       |
| PiTeDNarev                                                                | AAC TAG AGA CTT AGG AGA CCA TGC GAG G                      |
| 3'UTRfwd                                                                  | GGT CTC CTA AGT CTC TAG TTT TTT TGA CAG ACC G              |
| 3'UTRrev                                                                  | CAG TGA ATT CTC GTC GCG ACG TCA ACT G                      |
| Puc19fwd                                                                  | GTC GCG ACG AGA ATT CAC TGG CCG TCG TTT TAC                |
| Puc19rev                                                                  | AGC AGA AAA ACC TGC AGG CAT GCA AGC TTG                    |
| P1 for $\Delta$ TgPiT (Fig.S3)                                            | AAC TGC TCA TTT TTC TGC AGA AAA A                          |
| P2 for $\Delta$ TgPiT (Fig.S3)                                            | TGG TCG CTA GAC TGC ACA CGC GAG TTC CTA GAT CT             |
| P3 for $\Delta$ TgPiT (Fig.S3)                                            | ACG GAA AGT GCT TAC ATC GAA CAC GGT TAT CAA AC             |
| P4 for $\Delta$ TgPiT (Fig.S3)                                            | CGT TGT CAG ATC CAG CAA AAT GGC GTC CA                     |
| P5 for $\Delta$ TgPiT (Fig.S3)                                            | CTG TGG GCT ATG CAG GGT TTA CTT CTC GA                     |
| P6 for $\Delta$ TgPiT (Fig.S3)                                            | CAC CAC CTA AGT GTA AAC CTT GTT TAG GTC GAT A              |
| P7 for $\Delta$ TgPiT (Fig.S3)&P2 in $\Delta$ TgPiT:: <i>PiT</i> (Fig.S4) | CTT GCC AAT GTT GTA AGC GGC AAA AGG ACG                    |
| P8 for $\Delta$ TgPiT (Fig.S3)                                            | ATG GAG GCG GTT GCT GAG CTC TCT GCG CCC T                  |
| P1 for $\Delta$ TgPiT:: <i>PiT</i> (Fig.S4)                               | CCA GGA ACC GACGATGAACGC GAC TTG CGT CCA CT                |
| P3 for $\Delta$ TgPiT:: <i>PiT</i> (Fig.S4)                               | GAT CAA CAC GGC GTC GGT CAA CTG GAA GCT                    |
| P4 for $\Delta$ TgPiT:: <i>PiT</i> (Fig.S4)                               | GCA ACA CTG GTG GAT AGC CGG ATG AAC CAG                    |
| P5 for $\Delta$ TgPiT:: <i>PiT</i> (Fig.S4)                               | TCT ACG CCG ACC GCC TGA TTC GCC TCC TCA T                  |
| P6 for $\Delta$ TgPiT:: <i>PiT</i> (Fig.S4)                               | CAG TAC AAG AGA AGC GGA TCT GCT TTT GAG ACT                |

**S1 Table: List of primers used in this study**
