# Supplementary material for: A single Na+-Pi cotransporter in Toxoplasma plays key roles in phosphate import and control of parasite osmoregulation
Source: PubMed Central journal article supplement (PMC7817038; doi:10.1371/journal.ppat.1009067), 2020-12-31
Supplement: ppat.1009067.s009.pdf [file ppat.1009067.s009.pdf]

|                   |             |             |          |            |          |                                                                                                                                                                                         |
|-------------------|-------------|-------------|----------|------------|----------|-----------------------------------------------------------------------------------------------------------------------------------------------------------------------------------------|
| TGGT1_229180+26_1 | 1968.036234 | 2792.63733  | -0.50487 | 0.0010237  | 0.026224 | sp O00410 IP05 HUMAN Importin-5 OS=Homo sapiens GN=IP05 PE=1 SV=4//3.46538e-06                                                                                                          |
| TGGT1_206610+26_1 | 1614.841282 | 2286.272864 | -0.50161 | 0.0015576  | 0.03523  | sp O95018 ODP24 ARATH Dihydrolysoyllysine-residue acetyltransferase component 4 of pyruvate dehydrogenase complex, chloroplastic OS=Arabidopsis thaliana GN=LT2A PE=2 SV=1//1.48784e-13 |
| TGGT1_310750+26_1 | 2357.76408  | 3331.157714 | -0.49806 | 0.0012396  | 0.030112 | sp O91383 TME07 HUMAN Transmembrane emp-24 domain-containing protein 7 OS=Homo sapiens GN=TME07 PE=1 SV=2//8.22477e-11                                                                  |
| TGGT1_288920+26_1 | 2134.925994 | 3016.120344 | -0.49851 | 0.0012460  | 0.030112 | sp O87681 AKC0C DICDI ABC transporter G family member 12 OS=Dictyostelium discoideum GN=abcG12 PE=3 SV=1//1.01377e-49                                                                   |
| TGGT1_262380+26_1 | 1127.139348 | 1589.204414 | -0.49564 | 0.0018677  | 0.039854 | sp O748X8 EFTU_GEOSI Elongation factor Tu OS=Geobacter sulfurreducens (strain ATCC 51573 / DSM 12127 / PCA) GN=efu1 PE=3 SV=1//1.08697e-172                                             |
| TGGT1_257550+26_1 | 1752.865091 | 2460.813643 | -0.48942 | 0.0017938  | 0.039352 | -//                                                                                                                                                                                     |
| TGGT1_203600+26_1 | 1464.754779 | 2048.902856 | -0.48419 | 0.0022981  | 0.045325 | -//                                                                                                                                                                                     |
| TGGT1_254820+26_1 | 1124.718803 | 1850.652211 | -0.48235 | 0.0023918  | 0.046518 | -//                                                                                                                                                                                     |
| TGGT1_243920+26_1 | 2316.187883 | 3226.772342 | -0.47834 | 0.0012121  | 0.029778 | sp P55862 MCM5A XENLA DNA replication licensing factor mcm5-A OS=Xenopus laevis GN=mcm5-a PE=1 SV=2//1.10936e-149                                                                       |
| TGGT1_214970+26_1 | 4346.055993 | 6049.141373 | -0.47702 | 0.0011121  | 0.027975 | sp P97310 MCM2 MOUSE DNA replication licensing factor MCM2 OS=Mus musculus GN=Mcm2 PE=1 SV=3//3.39335e-159                                                                              |
| TGGT1_270510+26_1 | 6619.576552 | 9195.966194 | -0.47426 | 0.00077432 | 0.021401 | sp O6MEC9 SYN PARUW Asparagine-tRNA ligase OS=Protochlamydia amoebophila (strain UWE25) GN=asn5 PE=3 SV=1//3.35879e-172                                                                 |
| TGGT1_203630+26_1 | 13661.94874 | 18530.50723 | -0.47177 | 0.00066371 | 0.019363 | sp O5Y908 ROP4 TOKGO Rhostry protein 4 OS=Toxoplasma gondii GN=ROP4 PE=1 SV=1//1.96699e-81                                                                                              |
| TGGT1_273460+26_1 | 3643.800895 | 5049.942245 | -0.47082 | 0.0008917  | 0.022074 | sp O6P878 EIF3L_XENTR Eukaryotic translation initiation factor 3 subunit 1 OS=Xenopus tropicalis GN=EIF3L PE=2 SV=1//1.61084e-96                                                        |
| TGGT1_243200+26_1 | 6124.62741  | 8480.15355  | -0.46947 | 0.0023144  | 0.045433 | -//                                                                                                                                                                                     |
| TGGT1_218240+26_1 | 3878.562833 | 5349.939708 | -0.464   | 0.0025364  | 0.048543 | -//                                                                                                                                                                                     |
| TGGT1_213570+26_1 | 2179.030654 | 2996.12985  | -0.45941 | 0.0010934  | 0.027746 | -//                                                                                                                                                                                     |
| TGGT1_411430+26_1 | 3125.001252 | 4290.479996 | -0.45728 | 0.0022568  | 0.045146 | sp O5Y808 ROP4_TOXGO Rhostry protein 4 OS=Toxoplasma gondii GN=ROP4 PE=1 SV=1//2.47048e-13                                                                                              |
| TGGT1_255690+26_1 | 3025.948661 | 4148.675075 | -0.45526 | 0.0014172  | 0.033076 | sp O81983 SYS HELAN Serine-tRNA ligase OS=Heliolanthus annuus PE=2 SV=1//1.37664e-163                                                                                                   |
| TGGT1_314400+26_1 | 2123.387669 | 2886.432828 | -0.44292 | 0.0021828  | 0.044087 | sp P21839 ODDB_BOVIN 2-oxoisovalerate dehydrogenase subunit beta, mitochondrial OS=Bos taurus GN=BCKDHB PE=1 SV=2//1.15377e-160                                                         |
| TGGT1_226960+26_1 | 9838.558483 | 13352.70477 | -0.44061 | 0.0018425  | 0.039787 | sp F41GR5 PFP82 ARATH Pyrophosphate-fructose 6-phosphate 1-phosphotransferase subunit beta 2 OS=Arabidopsis thaliana GN=PFP-BETA2 PE=3 SV=1//6.68423e-28                                |
| TGGT1_318310+26_1 | 1879.042679 | 2549.545125 | -0.44024 | 0.0019844  | 0.041475 | sp P23254 TKT1_YEAST Transketolase 1 OS=Saccharomyces cerevisiae (strain ATCC 204508 / S288c) GN=TKL1 PE=1 SV=4//0                                                                      |
| TGGT1_311240+26_1 | 3819.110786 | 5143.509539 | -0.42952 | 0.002413   | 0.046821 | sp P42825 DNA2 ARATH Chaperone protein dna2 2 OS=Arabidopsis thaliana GN=AT2 PE=1 SV=2//3.27851e-127                                                                                    |
| TGGT1_225050+26_1 | 4222.05482  | 5661.093664 | -0.42314 | 0.0021116  | 0.043217 | sp O23255 SAHH1_ARATH Adenosylhomocysteinease 1 OS=Arabidopsis thaliana GN=SAHH1 PE=1 SV=1//0                                                                                           |
| TGGT1_261950+26_1 | 5913.201426 | 7794.848041 | -0.39858 | 0.0022382  | 0.045097 | sp P56480 ATP8 MOUSE ATP synthase subunit beta, mitochondrial OS=Mus musculus GN=Atp5b PE=1 SV=2//0                                                                                     |
| TGGT1_290200+26_1 | 5634.519024 | 7396.337087 | -0.39252 | 0.0022736  | 0.045267 | sp O8T882 TADH ARAIR Tauroopine dehydrogenase OS=Arabidopsis thaliana GN=tadh PE=1 SV=1//1.61004e-56                                                                                    |
| TGGT1_240210+26_1 | 0           | 0           | #NAME?   | 3.27e-45   | 3.05E-42 | sp O81609 S20A1 MOUSE Sodium-dependent phosphate transporter 1 OS=Mus musculus GN=Slc20a1 PE=1 SV=1//8.52597e-36                                                                        |

53 Table\_SwissProt  
KOPITusPar.DEG down sort
