# Supplementary material for: A single Na+-Pi cotransporter in Toxoplasma plays key roles in phosphate import and control of parasite osmoregulation
Source: PubMed Central journal article supplement (PMC7817038; doi:10.1371/journal.ppat.1009067), 2020-12-31
Supplement: ppat.1009067.s010.pdf [file ppat.1009067.s010.pdf]

| Gene_id             | readcount_DeltaTgPIT | readcount_Parental | logFC  | pval     | padj     | Annotation ToxoDB                                                   |
|---------------------|----------------------|--------------------|--------|----------|----------|---------------------------------------------------------------------|
| TGGT1_216290A-t26_1 | 336.3203738          | 0.972197767        | 8.4344 | 3.76E-56 | 5.27E-53 | hypothetical protein                                                |
| TGGT1_216290B-t26_1 | 616.7199557          | 6.840451961        | 6.4944 | 1.14E-80 | 4.78E-77 | hypothetical protein                                                |
| TGGT1_216335-t26_1  | 3376.925715          | 49.15317091        | 6.1023 | 6.36E-96 | 5.34E-92 | hypothetical protein                                                |
| TGGT1_221840-t26_1  | 45.13253831          | 1.046650121        | 5.4303 | 0.000447 | 0.014072 | hypothetical protein                                                |
| TGGT1_221310-t26_1  | 852.0608753          | 27.13845078        | 4.9725 | 4.01E-80 | 1.12E-76 | membrane alanylaminopeptidase N/metallopeptidase                    |
| TGGT1_243720-t26_1  | 43.08946634          | 1.45829665         | 4.885  | 3.10E-07 | 3.35E-05 | peroxisomal biogenesis factor PEX11                                 |
| TGGT1_237585-t26_1  | 19.18173244          | 1.046650121        | 4.1959 | 0.001324 | 0.031256 | hypothetical protein                                                |
| TGGT1_233153-t26_1  | 68.03330962          | 3.774953953        | 4.1717 | 0.000621 | 0.018314 | hypothetical protein                                                |
| TGGT1_245530-t26_1  | 759.2211462          | 47.36199725        | 4.0027 | 2.69E-51 | 2.83E-48 | hypothetical protein                                                |
| TGGT1_257720-t26_1  | 66.99716024          | 4.186600483        | 4.0002 | 5.44E-09 | 9.32E-07 | putative proton ATPase                                              |
| TGGT1_305100-t26_1  | 22.55596087          | 1.45829665         | 3.9512 | 0.001151 | 0.028616 | hypothetical protein                                                |
| TGGT1_304920-t26_1  | 40.07720883          | 2.728303832        | 3.8767 | 0.000438 | 0.013835 | hypothetical protein                                                |
| TGGT1_215900-t26_1  | 35.68572953          | 2.504946771        | 3.8325 | 3.94E-05 | 0.002068 | hypothetical protein                                                |
| TGGT1_220560-t26_1  | 37.38401105          | 2.728303832        | 3.7763 | 0.001258 | 0.030295 | hypothetical protein                                                |
| TGGT1_280570-t26_1  | 440.518231           | 34.75849388        | 3.6638 | 0.000349 | 0.011444 | SAG4                                                                |
| TGGT1_204300-t26_1  | 25.92331711          | 2.093300241        | 3.6304 | 0.000685 | 0.019783 | hypothetical protein                                                |
| TGGT1_223258-t26_1  | 51.52759448          | 4.186600483        | 3.6215 | 0.000496 | 0.01527  | hypothetical protein                                                |
| TGGT1_239365-t26_1  | 32.9976859           | 2.728303832        | 3.5963 | 0.000128 | 0.005236 | hypothetical protein                                                |
| TGGT1_203135-t26_1  | 36.36332409          | 3.065498008        | 3.5683 | 7.53E-05 | 0.003488 | cytoplasmic dynein heavy chain family protein                       |
| TGGT1_295995-t26_1  | 46.45164844          | 4.037695775        | 3.5241 | 5.17E-06 | 0.000402 | hypothetical protein                                                |
| TGGT1_293790-t26_1  | 186.5374478          | 16.3347554         | 3.5134 | 1.62E-14 | 5.93E-12 | hypothetical protein                                                |
| TGGT1_280500-t26_1  | 36.7029804           | 3.214402716        | 3.5133 | 7.49E-05 | 0.003488 | inorganic anion transporter, sulfate permease (SulP) family protein |
| TGGT1_268800-t26_1  | 94.915464            | 8.561490433        | 3.4707 | 1.10E-10 | 2.58E-08 | hypothetical protein                                                |
| TGGT1_248430-t26_1  | 54.19845765          | 5.307702957        | 3.3521 | 1.51E-06 | 0.000136 | hypothetical protein                                                |
| TGGT1_210478-t26_1  | 56.88478323          | 5.644897133        | 3.333  | 8.78E-07 | 8.38E-05 | hypothetical protein                                                |
| TGGT1_219610-t26_1  | 34.67363281          | 3.477144538        | 3.3179 | 0.00019  | 0.007013 | hypothetical protein                                                |
| TGGT1_284615-t26_1  | 24.57328213          | 2.653851479        | 3.2109 | 0.001755 | 0.038806 | hypothetical protein                                                |
| TGGT1_256700-t26_1  | 28.62338707          | 3.139950362        | 3.1884 | 0.001245 | 0.030112 | hypothetical protein                                                |
| TGGT1_252640-t26_1  | 328.515151           | 37.1539207         | 3.1444 | 4.09E-16 | 2.02E-13 | P-type ATPase Plasma Membrane A1                                    |
| TGGT1_225290-t26_1  | 229.587379           | 26.57358238        | 3.111  | 2.03E-19 | 1.22E-16 | nucleotide triphosphate (NTPase)                                    |
| TGGT1_268970-t26_1  | 70.03516846          | 8.522105673        | 3.0388 | 4.96E-07 | 5.03E-05 | hypothetical protein                                                |
| TGGT1_233610-t26_1  | 48.1585202           | 5.868254194        | 3.0368 | 0.000823 | 0.022221 | hypothetical protein                                                |
| TGGT1_207210-t26_1  | 104.0294887          | 12.78315851        | 3.0247 | 8.28E-10 | 1.58E-07 | hypothetical protein                                                |
| TGGT1_208020-t26_1  | 175.4267184          | 22.01903729        | 2.994  | 2.35E-11 | 6.32E-09 | AP2 domain transcription factor AP2lb-1                             |
| TGGT1_295945-t26_1  | 69.02822588          | 8.859299848        | 2.9619 | 1.28E-06 | 0.000119 | hypothetical protein                                                |
| TGGT1_216140-t26_1  | 1482.689559          | 192.3036117        | 2.9468 | 1.16E-51 | 1.39E-48 | tetratricopeptide repeat-containing protein                         |
| TGGT1_207130-t26_1  | 105.0518937          | 13.79474104        | 2.9289 | 4.53E-09 | 7.94E-07 | SAG2Y-related sequence                                              |
| TGGT1_235950-t26_1  | 36.35129776          | 4.821604074        | 2.9144 | 0.000237 | 0.008491 | subtilisin SUB8 (serine proteinase)                                 |
| TGGT1_202020-t26_1  | 484.5922853          | 64.66031609        | 2.9058 | 8.43E-05 | 0.003768 | tetratricopeptide repeat-containing protein DnaK                    |
| TGGT1_274170-t26_1  | 42.76525246          | 5.719349487        | 2.9025 | 0.000181 | 0.006736 | Predicted rho-kinase-like (ROPKL) kinase                            |
| TGGT1_280580-t26_1  | 367.4347461          | 49.1882385         | 2.9011 | 0.002288 | 0.045303 | SAG4.2                                                              |
| TGGT1_219218-t26_1  | 120.5214594          | 16.63256482        | 2.8572 | 1.83E-10 | 3.88E-08 | hypothetical protein                                                |
| TGGT1_220025-t26_1  | 58.92272106          | 8.224296257        | 2.8409 | 1.27E-05 | 0.000832 | hypothetical protein                                                |
| TGGT1_223262-t26_1  | 123.9077142          | 17.49524264        | 2.8242 | 6.30E-10 | 1.23E-07 | WD domain, G-beta repeat-containing protein                         |
| TGGT1_207160-t26_1  | 186.1273516          | 26.57358238        | 2.8082 | 2.71E-08 | 3.92E-06 | SAG2Y                                                               |
| TGGT1_248425-t26_1  | 66.31956568          | 9.608140554        | 2.7871 | 3.76E-06 | 0.00031  | hypothetical protein                                                |
| TGGT1_240200-t26_1  | 77.11640943          | 11.54821892        | 2.7394 | 0.000353 | 0.011529 | hypothetical protein                                                |
| TGGT1_268860-t26_1  | 106.3967745          | 16.03694599        | 2.73   | 1.56E-08 | 2.47E-06 | enolase                                                             |
| TGGT1_262970-t26_1  | 2103.927612          | 317.3410749        | 2.729  | 2.43E-56 | 4.08E-53 | hypothetical protein                                                |
| TGGT1_305280-t26_1  | 48.48958626          | 7.326550844        | 2.7265 | 0.000127 | 0.005236 | hypothetical protein                                                |
| TGGT1_253760-t26_1  | 89.89105937          | 13.79474104        | 2.7041 | 1.82E-07 | 2.18E-05 | hypothetical protein                                                |
| TGGT1_222340-t26_1  | 30.98036464          | 4.896056428        | 2.6617 | 0.002423 | 0.0469   | NOL1/NOP2/sun family protein                                        |
| TGGT1_313050-t26_1  | 59.60718781          | 9.419851086        | 2.6617 | 0.000747 | 0.020865 | hypothetical protein                                                |
| TGGT1_312435-t26_1  | 41.07040703          | 6.542642546        | 2.6502 | 0.000437 | 0.013835 | hypothetical protein                                                |
| TGGT1_243470-t26_1  | 50.50690753          | 8.224296257        | 2.6185 | 0.000144 | 0.005668 | hypothetical protein                                                |
| TGGT1_232420-t26_1  | 53.19323311          | 8.710395141        | 2.6104 | 7.53E-05 | 0.003488 | hypothetical protein                                                |
| TGGT1_245770B-t26_1 | 48.82924257          | 8.224296257        | 2.5698 | 0.000399 | 0.012851 | hypothetical protein                                                |
| TGGT1_204290-t26_1  | 33.66669023          | 5.719349487        | 2.5574 | 0.001842 | 0.039787 | hypothetical protein                                                |
| TGGT1_224170-t26_1  | 92.24975498          | 15.7348194         | 2.5516 | 2.05E-07 | 2.33E-05 | SAG-related sequence                                                |
| TGGT1_291040-t26_1  | 47.13611519          | 8.149843903        | 2.532  | 0.00031  | 0.010384 | lactate dehydrogenase LDH2                                          |
| TGGT1_238915-t26_1  | 28.2699864           | 4.896056428        | 2.5296 | 0.002611 | 0.049514 | hypothetical protein                                                |
| TGGT1_207150-t26_1  | 217.1180245          | 38.45899548        | 2.4971 | 2.02E-14 | 7.06E-12 | SAG2Y                                                               |
| TGGT1_316635-t26_1  | 125.9301896          | 22.76356083        | 2.4678 | 1.13E-08 | 1.83E-06 | DNA-directed RNA polymerase II subunit rpb1                         |
| TGGT1_203800-t26_1  | 33.99260215          | 6.20544837         | 2.4536 | 0.001573 | 0.035339 | hypothetical protein                                                |
| TGGT1_290970-t26_1  | 2576.472666          | 477.1197634        | 2.433  | 8.00E-38 | 6.72E-35 | 8-amino-7-oxononanoate synthase                                     |
| TGGT1_245980-t26_1  | 391.7245504          | 72.78372673        | 2.4282 | 0.000492 | 0.015239 | hypothetical protein                                                |
| TGGT1_365480-t26_1  | 171.9683057          | 32.40676898        | 2.4078 | 0.000583 | 0.017444 | hypothetical protein                                                |
| TGGT1_293780-t26_1  | 1252.091801          | 238.5666226        | 2.3919 | 1.80E-15 | 7.97E-13 | hypothetical protein                                                |
| TGGT1_290645-t26_1  | 39.05823991          | 7.475455552        | 2.3854 | 0.001449 | 0.033734 | hypothetical protein                                                |
| TGGT1_245770A-t26_1 | 258.9192855          | 50.64653515        | 2.354  | 3.34E-12 | 9.68E-10 | hypothetical protein                                                |
| TGGT1_250000-t26_1  | 75.40266549          | 14.84139116        | 2.345  | 9.65E-06 | 0.000676 | hypothetical protein                                                |
| TGGT1_232170-t26_1  | 37.36511254          | 7.401003198        | 2.3359 | 0.001543 | 0.035027 | hypothetical protein                                                |
| TGGT1_227630-t26_1  | 871.105164           | 173.0430984        | 2.3317 | 2.94E-12 | 8.81E-10 | hypothetical protein                                                |
| TGGT1_238440-t26_1  | 79.11826827          | 15.73913657        | 2.3297 | 1.16E-05 | 0.000774 | SAG-related sequence                                                |
| TGGT1_286460-t26_1  | 161.9143423          | 32.37601855        | 2.3222 | 6.10E-10 | 1.22E-07 | hypothetical protein                                                |
| TGGT1_285445-t26_1  | 60.92286185          | 12.18753968        | 2.3216 | 6.53E-05 | 0.003099 | hypothetical protein                                                |
| TGGT1_236880-t26_1  | 58.555576            | 11.77589315        | 2.314  | 0.002026 | 0.042134 | hypothetical protein                                                |
| TGGT1_462970-t26_1  | 36.35301581          | 7.326550844        | 2.3109 | 0.001876 | 0.039909 | hypothetical protein                                                |
| TGGT1_304930-t26_1  | 202.7086608          | 41.00764417        | 2.3054 | 1.64E-06 | 0.000145 | hypothetical protein                                                |
| TGGT1_265320-t26_1  | 114.1229671          | 23.5517863         | 2.2767 | 2.03E-07 | 2.33E-05 | hypothetical protein                                                |
| TGGT1_202430-t26_1  | 329.5976876          | 68.1067102         | 2.2748 | 4.50E-16 | 2.10E-13 | hypothetical protein                                                |
| TGGT1_265255-t26_1  | 58.24856259          | 12.22260727        | 2.2527 | 0.000183 | 0.006756 | hypothetical protein                                                |

|                     |             |             |        |          |          |                                                                              |
|---------------------|-------------|-------------|--------|----------|----------|------------------------------------------------------------------------------|
| TGGT1_295720-t26_1  | 95.63257364 | 20.37245118 | 2.2309 | 3.66E-05 | 0.001957 | putative sulfite oxidase                                                     |
| TGGT1_316560-t26_1  | 93.25669756 | 20.07464176 | 2.2158 | 4.01E-06 | 0.000324 | D protein family                                                             |
| TGGT1_215955-t26_1  | 45.78264412 | 9.905949969 | 2.2084 | 0.000877 | 0.023436 | hypothetical protein                                                         |
| TGGT1_219450-t26_1  | 106.3658497 | 23.02630265 | 2.2077 | 3.88E-07 | 4.12E-05 | hypothetical protein                                                         |
| TGGT1_212275-t26_1  | 147.4259484 | 32.03882438 | 2.2021 | 5.85E-08 | 7.80E-06 | hypothetical protein                                                         |
| TGGT1_411080-t26_1  | 317.7200253 | 69.22781267 | 2.1983 | 3.09E-06 | 0.00026  | hypothetical protein                                                         |
| TGGT1_213700-t26_1  | 89.89449546 | 19.62361047 | 2.1956 | 5.51E-06 | 0.000421 | hypothetical protein                                                         |
| TGGT1_295960-t26_1  | 1315.41631  | 289.532553  | 2.1837 | 1.13E-19 | 7.27E-17 | hypothetical protein                                                         |
| TGGT1_259020-t26_1  | 113.790183  | 25.1196029  | 2.1795 | 4.18E-07 | 4.39E-05 | BAG1                                                                         |
| TGGT1_264150-t26_1  | 106.0347836 | 24.03788518 | 2.1412 | 1.21E-06 | 0.000113 | hypothetical protein                                                         |
| TGGT1_268985-t26_1  | 74.39056877 | 16.96975899 | 2.1322 | 2.62E-05 | 0.001493 | hypothetical protein                                                         |
| TGGT1_256800-t26_1  | 43.09975462 | 9.905949969 | 2.1213 | 0.002571 | 0.048973 | hypothetical protein                                                         |
| TGGT1_305610-t26_1  | 244.1066978 | 56.18622951 | 2.1192 | 2.41E-11 | 6.32E-09 | hypothetical protein                                                         |
| TGGT1_209755A-t26_1 | 93.58776363 | 21.63814119 | 2.1127 | 1.93E-05 | 0.001191 | hypothetical protein                                                         |
| TGGT1_209755B-t26_1 | 156.5434092 | 37.937829   | 2.0449 | 1.68E-08 | 2.60E-06 | hypothetical protein                                                         |
| TGGT1_295020-t26_1  | 120.8679879 | 29.41572333 | 2.0388 | 7.07E-07 | 6.91E-05 | Sterol-sensing domain of SREBP cleavage-activation domain-containing protein |
| TGGT1_207470-t26_1  | 111.779734  | 27.28303832 | 2.0346 | 5.24E-06 | 0.000404 | hypothetical protein                                                         |
| TGGT1_293560-t26_1  | 68.33688694 | 16.70701717 | 2.0322 | 9.93E-05 | 0.004302 | hypothetical protein                                                         |
| TGGT1_269680-t26_1  | 53.18464288 | 13.01083274 | 2.0313 | 0.000887 | 0.023575 | putative acyl-CoA carboxyltransferase beta chain                             |
| TGGT1_208380-t26_1  | 160.2349593 | 39.36537522 | 2.0252 | 2.62E-08 | 3.87E-06 | hypothetical protein                                                         |
| TGGT1_270670-t26_1  | 324.5698469 | 80.10596041 | 2.0185 | 3.62E-13 | 1.17E-10 | hypothetical protein                                                         |
| TGGT1_295950-t26_1  | 2018.726973 | 500.1369015 | 2.0131 | 9.98E-25 | 6.99E-22 | KRUF family protein                                                          |
| TGGT1_207350-t26_1  | 49.47934838 | 12.44596433 | 1.9911 | 0.000818 | 0.022184 | hypothetical protein                                                         |
| TGGT1_293480-t26_1  | 2781.526278 | 701.3300332 | 1.9877 | 7.79E-35 | 5.95E-32 | MoeA N-terminal region (domain I and II) domain-containing protein           |
| TGGT1_364790-t26_1  | 43.0842922  | 10.87814774 | 1.9857 | 0.002434 | 0.04702  | hypothetical protein                                                         |
| TGGT1_268190-t26_1  | 48.47927798 | 12.26199203 | 1.9832 | 0.002054 | 0.042502 | hypothetical protein                                                         |
| TGGT1_269075-t26_1  | 104.7191095 | 26.91077655 | 1.9603 | 8.33E-05 | 0.003743 | hypothetical protein                                                         |
| TGGT1_301000-t26_1  | 75.76981055 | 19.47470576 | 1.96   | 0.002646 | 0.049964 | Carnosine-methyltransferase                                                  |
| TGGT1_267130-t26_1  | 158.5521402 | 41.15654888 | 1.9458 | 5.44E-08 | 7.50E-06 | SAG-related sequence                                                         |
| TGGT1_225105-t26_1  | 354.4212876 | 92.43808763 | 1.9389 | 4.97E-07 | 5.03E-05 | hypothetical protein                                                         |
| TGGT1_270260-t26_1  | 253.4847847 | 66.20601659 | 1.9369 | 8.40E-11 | 2.14E-08 | hypothetical protein                                                         |
| TGGT1_219110-t26_1  | 98.94151629 | 25.8684436  | 1.9354 | 0.002046 | 0.042439 | hypothetical protein                                                         |
| TGGT1_258910-t26_1  | 53.5139909  | 14.20638757 | 1.9134 | 0.001015 | 0.02613  | hypothetical protein                                                         |
| TGGT1_321490-t26_1  | 215.7353466 | 57.6051414  | 1.905  | 8.77E-05 | 0.00387  | SAG-related sequence                                                         |
| TGGT1_252395-t26_1  | 81.13215344 | 21.71691071 | 1.9015 | 7.75E-05 | 0.003539 | hypothetical protein                                                         |
| TGGT1_205050-t26_1  | 91.88432797 | 25.1196029  | 1.871  | 2.05E-05 | 0.001232 | hypothetical protein                                                         |
| TGGT1_267875-t26_1  | 77.76823329 | 21.37971654 | 1.8629 | 0.000136 | 0.005436 | Dynein regulatory complex protein 1                                          |
| TGGT1_321480-t26_1  | 164.6607995 | 45.26869701 | 1.8629 | 8.78E-05 | 0.00387  | SAG-related sequence                                                         |
| TGGT1_266035-t26_1  | 76.41476222 | 21.08622429 | 1.8576 | 0.000243 | 0.008547 | hypothetical protein                                                         |
| TGGT1_309030-t26_1  | 76.74926438 | 21.19574423 | 1.8564 | 0.000162 | 0.006228 | hypothetical protein                                                         |
| TGGT1_208730-t26_1  | 6062.769763 | 1683.378082 | 1.8486 | 1.62E-14 | 5.93E-12 | putative microneme protein                                                   |
| TGGT1_268220-t26_1  | 175.4146921 | 48.96919861 | 1.8408 | 1.39E-07 | 1.74E-05 | hypothetical protein                                                         |
| TGGT1_288520-t26_1  | 104.3760172 | 29.30620338 | 1.8325 | 3.07E-05 | 0.001663 | ATPase, AAA family protein                                                   |
| TGGT1_244590-t26_1  | 54.54498614 | 15.47639475 | 1.8174 | 0.002624 | 0.049646 | katanin-like family protein                                                  |
| TGGT1_200340-t26_1  | 114.8039978 | 32.7045784  | 1.8116 | 8.19E-06 | 0.000593 | hypothetical protein                                                         |
| TGGT1_233210-t26_1  | 74.72850702 | 21.34464894 | 1.8078 | 0.000236 | 0.008491 | hypothetical protein                                                         |
| TGGT1_409260-t26_1  | 366.0159892 | 105.1861785 | 1.799  | 2.15E-05 | 0.001283 | hypothetical protein                                                         |
| TGGT1_292935-t26_1  | 160.5986682 | 47.58967148 | 1.7547 | 1.44E-06 | 0.000132 | hypothetical protein                                                         |
| TGGT1_225070-t26_1  | 51.16044943 | 15.21365293 | 1.7497 | 0.002248 | 0.045146 | hypothetical protein                                                         |
| TGGT1_220420-t26_1  | 91.24109435 | 27.13845078 | 1.7493 | 0.000147 | 0.005738 | 3'5'-cyclic nucleotide phosphodiesterase domain-containing protein           |
| TGGT1_203720-t26_1  | 456.5107671 | 137.8600065 | 1.7274 | 2.73E-13 | 9.18E-11 | vitamin k epoxide reductase family protein                                   |
| TGGT1_297350-t26_1  | 103.6829602 | 31.51334073 | 1.7181 | 5.07E-05 | 0.00255  | Exosome complex component Rrp41                                              |
| TGGT1_220460-t26_1  | 73.70610202 | 22.57958853 | 1.7068 | 0.000818 | 0.022184 | SNF7 family protein                                                          |
| TGGT1_228175-t26_1  | 114.1384296 | 35.10000522 | 1.7012 | 4.08E-05 | 0.002114 | hypothetical protein                                                         |
| TGGT1_201840-t26_1  | 1276.135241 | 393.8652183 | 1.696  | 0.000518 | 0.015708 | aspartyl protease ASP1                                                       |
| TGGT1_235650-t26_1  | 56.89165542 | 17.8675044  | 1.6709 | 0.002528 | 0.048492 | carrier superfamily protein                                                  |
| TGGT1_259270-t26_1  | 102.3535417 | 32.18772908 | 1.669  | 0.000164 | 0.006251 | SAG-related sequence                                                         |
| TGGT1_310160-t26_1  | 122.8715648 | 38.80050682 | 1.663  | 1.63E-05 | 0.00103  | argonaute AGO                                                                |
| TGGT1_221220-t26_1  | 104.0346428 | 32.85780027 | 1.6628 | 0.000109 | 0.004585 | hypothetical protein                                                         |
| TGGT1_216710-t26_1  | 93.59119973 | 29.75723467 | 1.6531 | 0.000242 | 0.008542 | transporter, major facilitator family protein                                |
| TGGT1_285940-t26_1  | 68.32142452 | 22.09348965 | 1.6287 | 0.000967 | 0.025152 | hypothetical protein                                                         |
| TGGT1_266670-t26_1  | 61.59358422 | 20.00018941 | 1.6228 | 0.001849 | 0.039787 | hypothetical protein                                                         |
| TGGT1_281400-t26_1  | 766.2577179 | 248.9759401 | 1.6218 | 5.93E-13 | 1.85E-10 | phosphofructokinase domain-containing protein                                |
| TGGT1_293258-t26_1  | 112.7901126 | 36.82104369 | 1.615  | 0.000101 | 0.004364 | hypothetical protein                                                         |
| TGGT1_293290-t26_1  | 202.6141682 | 66.28046894 | 1.6121 | 0.000263 | 0.009167 | hypothetical protein                                                         |
| TGGT1_218500-t26_1  | 105.0055064 | 34.35116451 | 1.612  | 0.001124 | 0.028019 | hypothetical protein                                                         |
| TGGT1_257670-t26_1  | 106.7312767 | 35.69562405 | 1.5802 | 0.000144 | 0.005668 | hypothetical protein                                                         |
| TGGT1_264485-t26_1  | 384.7618547 | 130.9715355 | 1.5547 | 3.55E-09 | 6.48E-07 | AP2 domain transcription factor AP2IX-3                                      |
| TGGT1_213020-t26_1  | 734.8414864 | 250.2281484 | 1.5542 | 3.84E-15 | 1.61E-12 | hypothetical protein                                                         |
| TGGT1_312930-t26_1  | 170.0334507 | 58.05617268 | 1.5503 | 1.02E-05 | 0.00069  | cystathionine beta-lyase                                                     |
| TGGT1_233920-t26_1  | 421.1354871 | 144.0740892 | 1.5475 | 9.27E-11 | 2.23E-08 | zinc finger, C3HC4 type (RING finger) domain-containing protein              |
| TGGT1_223480-t26_1  | 223.197477  | 76.55868068 | 1.5437 | 3.05E-07 | 3.35E-05 | sushi domain (scr repeat) domain-containing protein                          |
| TGGT1_227370-t26_1  | 115.8143765 | 39.73763699 | 1.5432 | 0.000137 | 0.005436 | hydrolase Coe/NonD family protein                                            |
| TGGT1_210400-t26_1  | 236.3135013 | 81.27076481 | 1.5399 | 1.43E-07 | 1.77E-05 | hypothetical protein                                                         |
| TGGT1_288640-t26_1  | 2346.647679 | 812.0467415 | 1.531  | 9.22E-06 | 0.00066  | radical SAM domain-containing protein                                        |
| TGGT1_269050-t26_1  | 471.7145526 | 163.7548834 | 1.5264 | 3.01E-06 | 0.000255 | putative adenylate kinase                                                    |
| TGGT1_208740-t26_1  | 6201.903431 | 2153.627173 | 1.5259 | 4.43E-08 | 6.20E-06 | putative microneme protein                                                   |
| TGGT1_253460-t26_1  | 154.529524  | 53.8695722  | 1.5203 | 2.04E-05 | 0.001232 | hypothetical protein                                                         |
| TGGT1_215180-t26_1  | 60.91598966 | 21.27019659 | 1.518  | 0.002581 | 0.049067 | hypothetical protein                                                         |
| TGGT1_228160-t26_1  | 145.0620987 | 51.06681602 | 1.5062 | 0.000892 | 0.023651 | acid phosphatase                                                             |
| TGGT1_254430-t26_1  | 89.23236332 | 32.14834432 | 1.4728 | 0.001696 | 0.037903 | putative microneme protein                                                   |
| TGGT1_293280-t26_1  | 2513.65343  | 908.2905335 | 1.4686 | 6.99E-07 | 6.91E-05 | cyclin protein-U4                                                            |
| TGGT1_223725-t26_1  | 323.5800848 | 117.1066592 | 1.4663 | 0.000167 | 0.006302 | hypothetical protein                                                         |

|                     |             |             |         |          |          |                                                                            |
|---------------------|-------------|-------------|---------|----------|----------|----------------------------------------------------------------------------|
| TGGT1_213255-t26_1  | 467.9422543 | 172.0579491 | 1.4434  | 1.45E-10 | 3.29E-08 | hypothetical protein                                                       |
| TGGT1_307590-t26_1  | 99.6465996  | 36.71152374 | 1.4406  | 0.000718 | 0.020477 | hypothetical protein                                                       |
| TGGT1_281460-t26_1  | 124.887168  | 46.23657761 | 1.4335  | 8.33E-05 | 0.003743 | hypothetical protein                                                       |
| TGGT1_310480-t26_1  | 228.3026298 | 84.55098554 | 1.4331  | 0.002131 | 0.043274 | PACRG family protein                                                       |
| TGGT1_215970-t26_1  | 798.4317753 | 298.6454301 | 1.4187  | 1.69E-10 | 3.73E-08 | hypothetical protein                                                       |
| TGGT1_220585-t26_1  | 88.52556197 | 33.19499444 | 1.4151  | 0.000936 | 0.024492 | hypothetical protein                                                       |
| TGGT1_287960-t26_1  | 221.2110806 | 83.43420024 | 1.4067  | 4.55E-06 | 0.00036  | hypothetical protein                                                       |
| TGGT1_203290-t26_1  | 2497.79662  | 952.9555076 | 1.3902  | 2.31E-19 | 1.29E-16 | hypothetical protein                                                       |
| TGGT1_249840-t26_1  | 340.6998267 | 131.3259983 | 1.3753  | 7.96E-08 | 1.03E-05 | putative dynein heavy chain 1                                              |
| TGGT1_294400-t26_1  | 392.4330699 | 154.2648971 | 1.347   | 0.001489 | 0.03428  | Rhoptry neck protein 2                                                     |
| TGGT1_253330-t26_1  | 697.3870354 | 275.628292  | 1.3392  | 0.000712 | 0.020415 | Predicted rhoptyr-kinase-like (ROPKL) pseudokinase                         |
| TGGT1_205658-t26_1  | 82.12878774 | 32.78334792 | 1.3249  | 0.002253 | 0.045146 | F5/8 type C domain-containing protein                                      |
| TGGT1_294805-t26_1  | 87.85483959 | 35.21384233 | 1.319   | 0.001992 | 0.041537 | hypothetical protein                                                       |
| TGGT1_206550-t26_1  | 391.1792455 | 156.8529306 | 1.3184  | 3.00E-08 | 4.27E-06 | hypothetical protein                                                       |
| TGGT1_319520-t26_1  | 310.0934793 | 125.3352727 | 1.3069  | 7.88E-07 | 7.61E-05 | hypothetical protein                                                       |
| TGGT1_248240-t26_1  | 169.6697417 | 68.70664619 | 1.3042  | 6.26E-05 | 0.003025 | hypothetical protein                                                       |
| TGGT1_281930-t26_1  | 205.9987049 | 84.29256089 | 1.2892  | 7.90E-06 | 0.000577 | SAG-related sequence                                                       |
| TGGT1_312330-t26_1  | 2124.730831 | 874.7809912 | 1.2803  | 1.85E-10 | 3.88E-08 | DNA-directed RNA polymerase II subunit RPB1                                |
| TGGT1_272730-t26_1  | 183.4685147 | 77.30752139 | 1.2469  | 7.66E-05 | 0.003515 | hypothetical protein                                                       |
| TGGT1_203890-t26_1  | 92.56192253 | 39.17708575 | 1.2404  | 0.002359 | 0.046093 | hypothetical protein                                                       |
| TGGT1_308965-t26_1  | 166.2869231 | 70.72981125 | 1.2333  | 0.000136 | 0.005436 | hypothetical protein                                                       |
| TGGT1_272370-t26_1  | 6010.120117 | 2569.366916 | 1.226   | 3.94E-09 | 7.04E-07 | hypothetical protein                                                       |
| TGGT1_275870-t26_1  | 102.3380793 | 43.81040036 | 1.224   | 0.002132 | 0.043274 | tubulin/FtsZ family, GTPase domain-containing protein                      |
| TGGT1_220720-t26_1  | 269.6731781 | 116.213231  | 1.2144  | 7.16E-06 | 0.000532 | hypothetical protein                                                       |
| TGGT1_300130-t26_1  | 282.1322244 | 121.9805996 | 1.2097  | 9.81E-06 | 0.000681 | apical membrane antigen 1 domain-containing protein                        |
| TGGT1_209040-t26_1  | 549.9524968 | 245.5640833 | 1.1632  | 0.002366 | 0.046122 | hypothetical protein                                                       |
| TGGT1_215340-t26_1  | 112.7609058 | 50.69023708 | 1.1535  | 0.001819 | 0.039599 | AP2 domain transcription factor AP2X-10                                    |
| TGGT1_236670A-t26_1 | 281.4666562 | 126.7585017 | 1.1509  | 2.04E-05 | 0.001232 | hypothetical protein                                                       |
| TGGT1_205265-t26_1  | 532.5343316 | 242.3847482 | 1.1356  | 5.58E-08 | 7.56E-06 | transporter, cation channel family protein                                 |
| TGGT1_293500-t26_1  | 249.774336  | 114.1943831 | 1.1291  | 2.00E-05 | 0.001226 | hypothetical protein                                                       |
| TGGT1_219650-t26_1  | 498.6654288 | 230.8235778 | 1.1113  | 0.000282 | 0.009635 | transporter, small conductance mechanosensitive ion channel (MscS) protein |
| TGGT1_294785-t26_1  | 151.5104143 | 70.12987525 | 1.1113  | 0.001598 | 0.035813 | zinc finger (CCHC type) motif-containing protein                           |
| TGGT1_306620-t26_1  | 1229.966036 | 569.7321285 | 1.1103  | 8.38E-09 | 1.38E-06 | AP2 domain transcription factor AP2IX-9                                    |
| TGGT1_291170-t26_1  | 175.4026658 | 82.6896767  | 1.0849  | 0.00075  | 0.020865 | hypothetical protein                                                       |
| TGGT1_212160-t26_1  | 205.0037886 | 98.35004375 | 1.0597  | 0.000226 | 0.008213 | hypothetical protein                                                       |
| TGGT1_286740-t26_1  | 183.4960035 | 88.48347854 | 1.0523  | 0.001096 | 0.027746 | microneme-like protein                                                     |
| TGGT1_255290-t26_1  | 221.8388518 | 106.9859865 | 1.0521  | 0.000176 | 0.006587 | hypothetical protein                                                       |
| TGGT1_245440-t26_1  | 277.7647978 | 134.1244373 | 1.0503  | 0.000107 | 0.004557 | hypothetical protein                                                       |
| TGGT1_267460-t26_1  | 142.7205835 | 69.15336032 | 1.0453  | 0.00127  | 0.030479 | AP2 domain transcription factor AP2IX-1                                    |
| TGGT1_297910-t26_1  | 127.2321192 | 62.27352359 | 1.0308  | 0.001968 | 0.041335 | hypothetical protein                                                       |
| TGGT1_315123-t26_1  | 247.4396931 | 121.6083378 | 1.0248  | 0.000239 | 0.008517 | hypothetical protein                                                       |
| TGGT1_254640-t26_1  | 183.1305765 | 90.05129513 | 1.0241  | 0.000719 | 0.020477 | hypothetical protein                                                       |
| TGGT1_233490-t26_1  | 3188.210651 | 1589.295074 | 1.0044  | 2.62E-08 | 3.87E-06 | hypothetical protein                                                       |
| TGGT1_250100-t26_1  | 2119.712782 | 1058.373147 | 1.002   | 8.93E-11 | 2.21E-08 | hypothetical protein                                                       |
| TGGT1_363340-t26_1  | 306.0141676 | 153.108727  | 0.99904 | 5.82E-05 | 0.002861 | hypothetical protein                                                       |
| TGGT1_250220-t26_1  | 3793.505992 | 1903.646694 | 0.99477 | 6.93E-12 | 1.94E-09 | hypothetical protein                                                       |
| TGGT1_215500-t26_1  | 258.5263698 | 130.6866775 | 0.9842  | 0.000166 | 0.006292 | TPR repeat-containing protein                                              |
| TGGT1_222160-t26_1  | 845.7929546 | 430.0113434 | 0.97593 | 0.001283 | 0.030704 | aldehyde dehydrogenase                                                     |
| TGGT1_200350-t26_1  | 1347.962666 | 685.731167  | 0.97507 | 5.98E-09 | 1.00E-06 | subtilisin SUB3                                                            |
| TGGT1_272440-t26_1  | 200.3207583 | 102.5673947 | 0.96574 | 0.001017 | 0.02613  | RNA recognition motif-containing protein                                   |
| TGGT1_223750-t26_1  | 460.231524  | 235.8728561 | 0.96435 | 1.56E-05 | 0.001    | hypothetical protein                                                       |
| TGGT1_212810-t26_1  | 181.0995108 | 94.16344326 | 0.94354 | 0.00138  | 0.032386 | hypothetical protein                                                       |
| TGGT1_245428-t26_1  | 942.253794  | 492.0172777 | 0.93741 | 1.94E-07 | 2.26E-05 | hypothetical protein                                                       |
| TGGT1_232590-t26_1  | 1107.302355 | 583.846795  | 0.92339 | 1.92E-07 | 2.26E-05 | glutamate-cysteine ligase, catalytic subunit domain-containing protein     |
| TGGT1_304730-t26_1  | 402.9194641 | 214.9177376 | 0.90671 | 0.001469 | 0.034002 | mob1 phocein family protein                                                |
| TGGT1_200320-t26_1  | 500.27609   | 267.2416093 | 0.90458 | 2.75E-05 | 0.001528 | hypoxanthine-xanthine-guanine phosphoribosyl transferase                   |
| TGGT1_239810-t26_1  | 723.7805804 | 388.201992  | 0.89874 | 2.27E-06 | 0.000195 | hypothetical protein                                                       |
| TGGT1_218740-t26_1  | 488.8291404 | 263.2303468 | 0.893   | 2.78E-05 | 0.001539 | hypothetical protein                                                       |
| TGGT1_235460-t26_1  | 200.963992  | 108.5581203 | 0.88847 | 0.001867 | 0.039854 | hypothetical protein                                                       |
| TGGT1_266870-t26_1  | 630.5479355 | 341.1815061 | 0.88607 | 9.26E-06 | 0.00066  | transporter, major facilitator family protein                              |
| TGGT1_224710-t26_1  | 210.7057878 | 114.5402116 | 0.87938 | 0.001903 | 0.040173 | hypothetical protein                                                       |
| TGGT1_215910-t26_1  | 7953.027456 | 4337.198355 | 0.87474 | 2.71E-10 | 5.55E-08 | hypothetical protein                                                       |
| TGGT1_257360-t26_1  | 369.9372406 | 202.2354647 | 0.87124 | 0.000106 | 0.004532 | hypothetical protein                                                       |
| TGGT1_273350-t26_1  | 398.6585564 | 218.3031611 | 0.86882 | 0.001295 | 0.03083  | molybdopterin converting factor, subunit 2 protein                         |
| TGGT1_239090-t26_1  | 597.527915  | 330.3427431 | 0.85504 | 1.76E-05 | 0.001103 | SAG-related sequence                                                       |
| TGGT1_254960-t26_1  | 290.8378709 | 160.8248083 | 0.85473 | 0.002559 | 0.04887  | hypothetical protein                                                       |
| TGGT1_214220-t26_1  | 14512.67401 | 8060.70308  | 0.84834 | 1.64E-07 | 2.00E-05 | hypothetical protein                                                       |
| TGGT1_269417-t26_1  | 813.2443631 | 453.6505335 | 0.84211 | 4.25E-06 | 0.00034  | hypothetical protein                                                       |
| TGGT1_248140-t26_1  | 240.3687604 | 136.0645157 | 0.82096 | 0.002114 | 0.043217 | hypothetical protein                                                       |
| TGGT1_244710-t26_1  | 671.2202726 | 382.9115577 | 0.80978 | 5.21E-05 | 0.002604 | hypothetical protein                                                       |
| TGGT1_214575-t26_1  | 541.9862945 | 309.81707   | 0.80684 | 7.17E-05 | 0.003383 | hypothetical protein                                                       |
| TGGT1_266910-t26_1  | 740.5812826 | 424.274195  | 0.80366 | 1.29E-05 | 0.00084  | putative cell-cycle-associated protein kinase GSK                          |
| TGGT1_289050-t26_1  | 5560.864114 | 3191.086253 | 0.80126 | 7.64E-08 | 1.00E-05 | putative FIKK kinase                                                       |
| TGGT1_233925-t26_1  | 403.9934105 | 234.8040899 | 0.78287 | 0.000795 | 0.0219   | hypothetical protein                                                       |
| TGGT1_234180-t26_1  | 732.8310373 | 427.8694938 | 0.77631 | 2.63E-05 | 0.001493 | hypothetical protein                                                       |
| TGGT1_225790-t26_1  | 669.5958671 | 395.06456   | 0.7612  | 5.96E-05 | 0.002912 | Protein disulfide isomerase (PDI) family protein                           |
| TGGT1_225540-t26_1  | 2505.026814 | 1486.776759 | 0.75264 | 3.18E-05 | 0.001712 | hypothetical protein                                                       |
| TGGT1_237510-t26_1  | 756.6631571 | 449.2055084 | 0.75228 | 0.000876 | 0.023436 | hypothetical protein                                                       |
| TGGT1_236620-t26_1  | 820.6704145 | 505.2557847 | 0.69979 | 8.17E-05 | 0.003713 | protein kinase                                                             |
| TGGT1_239020-t26_1  | 1638.979214 | 1020.811897 | 0.68308 | 6.32E-05 | 0.003034 | ABC transporter transmembrane region domain-containing protein             |
| TGGT1_220230A-t26_1 | 853.4246547 | 536.0947371 | 0.67078 | 0.000304 | 0.010229 | hypothetical protein                                                       |
| TGGT1_236890-t26_1  | 2101.693817 | 1321.533359 | 0.66934 | 0.002082 | 0.042938 | hypothetical protein                                                       |
| TGGT1_266880-t26_1  | 1139.956949 | 718.9126797 | 0.66509 | 0.000154 | 0.005959 | putative tRNA-dihydrouridine synthase                                      |

|                    |             |             |         |          |          |                                                                |
|--------------------|-------------|-------------|---------|----------|----------|----------------------------------------------------------------|
| TGGT1_208450-t26_1 | 4005.96624  | 2535.22237  | 0.66004 | 7.56E-05 | 0.003488 | kazal-type serine protease inhibitor domain-containing protein |
| TGGT1_236010-t26_1 | 2955.645395 | 1884.530238 | 0.64927 | 1.02E-05 | 0.00069  | prenylcysteine oxidase                                         |
| TGGT1_283810-t26_1 | 1166.101377 | 749.9005368 | 0.63692 | 0.000125 | 0.005191 | putative raffinose synthase 1                                  |
| TGGT1_293810-t26_1 | 636.9464278 | 413.1419397 | 0.62453 | 0.001469 | 0.034002 | carboxyvinyl-carboxyphosphonate phosphorylmutase               |
| TGGT1_230170-t26_1 | 4119.849197 | 2693.786645 | 0.61296 | 0.00013  | 0.005291 | hypothetical protein                                           |
| TGGT1_273320-t26_1 | 2009.605559 | 1316.685321 | 0.61    | 4.65E-05 | 0.002392 | hypothetical protein                                           |
| TGGT1_213445-t26_1 | 3766.730356 | 2478.891553 | 0.60362 | 3.81E-05 | 0.002012 | hypothetical protein                                           |
| TGGT1_278940-t26_1 | 1446.650429 | 952.7925909 | 0.60248 | 0.000416 | 0.013241 | HECT-domain (ubiquitin-transferase) domain-containing protein  |
| TGGT1_263220-t26_1 | 614.359542  | 404.996413  | 0.60117 | 0.001896 | 0.040117 | rhoptyr kinase family protein ROP21                            |
| TGGT1_263270-t26_1 | 1324.888372 | 873.4138853 | 0.60113 | 0.000223 | 0.00815  | glycerophosphodiester phosphodiesterase family protein         |
| TGGT1_219230-t26_1 | 1144.926376 | 761.1158787 | 0.58907 | 0.000475 | 0.014833 | AMP-binding enzyme domain-containing protein                   |
| TGGT1_203060-t26_1 | 3012.364045 | 2006.83455  | 0.58597 | 0.000117 | 0.004884 | TrmH family RNA methyltransferase                              |
| TGGT1_262630-t26_1 | 604.2385748 | 402.8944784 | 0.58472 | 0.00185  | 0.039787 | hypothetical protein                                           |
| TGGT1_311100-t26_1 | 5409.314184 | 3610.907318 | 0.58308 | 0.000237 | 0.008491 | zinc finger (CCCH type) motif-containing protein               |
| TGGT1_269425-t26_1 | 1103.732269 | 738.9436195 | 0.57885 | 0.00059  | 0.017579 | hypothetical protein                                           |
| TGGT1_203870-t26_1 | 797.2020036 | 534.5619881 | 0.57659 | 0.00215  | 0.043537 | RAB43, member RAS oncogene family protein                      |
| TGGT1_269430-t26_1 | 1115.635702 | 751.2315145 | 0.57054 | 0.000916 | 0.024052 | polyprenyl synthetase superfamily protein                      |
| TGGT1_316430-t26_1 | 1144.015644 | 772.8308012 | 0.56588 | 0.00112  | 0.027997 | putative target of rapamycin (TOR)                             |
| TGGT1_213280-t26_1 | 3688.333151 | 2507.024318 | 0.55699 | 0.000332 | 0.011103 | SAG-related sequence                                           |
| TGGT1_204540-t26_1 | 1423.399693 | 968.5101416 | 0.5555  | 0.000901 | 0.023785 | DUF367 domain-containing protein                               |
| TGGT1_263740-t26_1 | 1367.380972 | 943.7978681 | 0.53487 | 0.00073  | 0.020588 | ABC transporter transmembrane region domain-containing protein |
| TGGT1_208570-t26_1 | 3363.038805 | 2328.664352 | 0.53026 | 0.00029  | 0.00987  | putative ubiquitin conjugating enzyme E2                       |
| TGGT1_203790-t26_1 | 3172.121904 | 2199.050758 | 0.52857 | 0.000274 | 0.00943  | hypothetical protein                                           |
| TGGT1_237550-t26_1 | 1539.153938 | 1068.256981 | 0.52688 | 0.001229 | 0.030098 | hypothetical protein                                           |
| TGGT1_205680-t26_1 | 993.6662793 | 690.2107295 | 0.52572 | 0.001234 | 0.030112 | hypothetical protein                                           |
| TGGT1_304670-t26_1 | 1343.411409 | 933.9836391 | 0.52443 | 0.001339 | 0.03152  | leucine rich repeat-containing protein                         |
| TGGT1_216770-t26_1 | 2549.801314 | 1803.014    | 0.49997 | 0.001108 | 0.027964 | hypothetical protein                                           |
| TGGT1_300055-t26_1 | 1707.763477 | 1222.964275 | 0.48173 | 0.001976 | 0.041404 | hypothetical protein                                           |
| TGGT1_204050-t26_1 | 12721.38737 | 9124.079152 | 0.47951 | 0.000413 | 0.013204 | subtilisin SUB1                                                |
| TGGT1_208370-t26_1 | 5762.545732 | 4169.813635 | 0.46672 | 0.000798 | 0.021914 | putative myosin heavy chain                                    |
| TGGT1_286090-t26_1 | 9065.382738 | 6574.291614 | 0.46353 | 0.001119 | 0.027997 | putative translation initiation factor SUI1                    |
| TGGT1_268980-t26_1 | 2197.846442 | 1606.169325 | 0.45247 | 0.002308 | 0.045418 | hypothetical protein                                           |
| TGGT1_239420-t26_1 | 11916.54748 | 8847.030888 | 0.4297  | 0.002281 | 0.045297 | calcium-dependent protein kinase                               |

S4 Table. ToxoDB

KOPITvsPar.DEG\_up sort
