# Supplementary material for: A single Na+-Pi cotransporter in Toxoplasma plays key roles in phosphate import and control of parasite osmoregulation
Source: PubMed Central journal article supplement (PMC7817038; doi:10.1371/journal.ppat.1009067), 2020-12-31
Supplement: ppat.1009067.s011.pdf [file ppat.1009067.s011.pdf]

| Gene_id            | readcount_DeltaTgPIT | readcount_Parental | logFC    | pval       | padj       | Annotation Tox08                                                    |
|--------------------|----------------------|--------------------|----------|------------|------------|---------------------------------------------------------------------|
| TGGT1_226755-t26.1 | 96.2723117           | 1315.37593         | -3.7722  | 3.16E-70   | 6.63E-67   | 3'-5' cyclic nucleotide phosphodiesterase domain-containing protein |
| TGGT1_226450-t26.1 | 16.49884295          | 59.51015217        | -1.8508  | 0.00074724 | 0.020865   | hypothetical protein                                                |
| TGGT1_256550-t26.1 | 73.38706228          | 710.525579         | -1.5204  | 1.14E-06   | 0.00010806 | hypothetical protein                                                |
| TGGT1_203230-t26.1 | 133.3081357          | 375.864476         | -1.4951  | 2.75E-09   | 4.19E-09   | hypothetical protein                                                |
| TGGT1_239350-t26.1 | 529.5805077          | 1471.387768        | -1.4743  | 5.57E-18   | 2.92E-15   | RAP domain-containing protein                                       |
| TGGT1_254890-t26.1 | 69.02135369          | 181.6660897        | -1.3962  | 1.05E-05   | 0.00070616 | hypothetical protein                                                |
| TGGT1_411400-t26.1 | 99.9604852           | 238.9469884        | -1.2573  | 2.92E-05   | 0.0016033  | hypothetical protein                                                |
| TGGT1_329800-t26.1 | 242.108275           | 548.4710965        | -1.1798  | 0.00025114 | 0.0087918  | hypothetical protein                                                |
| TGGT1_308900-t26.1 | 12770.00014          | 27390.95681        | -1.1009  | 1.51E-14   | 5.93E-12   | ROP5                                                                |
| TGGT1_261022-t26.1 | 2909.590612          | 6027.365613        | -1.0501  | 5.06E-06   | 0.00039697 | cytoplasmic dynein heavy chain family protein                       |
| TGGT1_261075-t26.1 | 227.8513005          | 464.410527         | -1.0273  | 0.00009305 | 0.023785   | hypothetical protein                                                |
| TGGT1_276910-t26.1 | 180.1320833          | 357.770369         | -0.98998 | 1.60E-05   | 0.0010196  | ER lumen protein retaining receptor (ERD2) family protein           |
| TGGT1_310740-t26.1 | 434.8174329          | 855.9186427        | -0.97706 | 0.00033893 | 0.011167   | hypothetical protein                                                |
| TGGT1_255245-t26.1 | 211.7866064          | 415.8222245        | -0.97336 | 6.74E-06   | 0.00050551 | hypothetical protein                                                |
| TGGT1_269930-t26.1 | 482.025706           | 940.4259263        | -0.9642  | 4.56E-07   | 4.73E-05   | calcium binding EGF domain-containing protein                       |
| TGGT1_238040-t26.1 | 93.39313788          | 180.5498072        | -0.94271 | 0.0020893  | 0.042938   | protein disulfide-isomerase domain-containing                       |
| TGGT1_267140-t26.1 | 221.5232481          | 425.6537221        | -0.94222 | 2.43E-05   | 0.0014094  | SAG-related sequence                                                |
| TGGT1_275650-t26.1 | 1767.331667          | 3390.169876        | -0.93978 | 3.09E-07   | 3.35E-05   | hypothetical protein                                                |
| TGGT1_273970-t26.1 | 184.7807527          | 340.4369825        | -0.88157 | 0.00065581 | 0.019237   | CorA family Mg <sup>2+</sup> transporter protein                    |
| TGGT1_225990-t26.1 | 615.1058585          | 1128.704794        | -0.87576 | 3.11E-07   | 3.35E-05   | putative malonyl CoA-acyl carrier protein transacylase              |
| TGGT1_313520-t26.1 | 132.6305411          | 241.2550114        | -0.86315 | 0.0020902  | 0.042938   | hypothetical protein                                                |
| TGGT1_411390-t26.1 | 227.1994766          | 411.1187747        | -0.8556  | 0.00036582 | 0.012516   | hypothetical protein                                                |
| TGGT1_209090-t26.1 | 596.8262678          | 1077.125446        | -0.8518  | 3.51E-06   | 0.00029213 | proteasome maturation factor ump1 protein                           |
| TGGT1_262590-t26.1 | 297.2758782          | 536.3445274        | -0.85136 | 3.05E-05   | 0.0016629  | Nucleolar protein 58                                                |
| TGGT1_262040-t26.1 | 662.1990225          | 1190.58447         | -0.84633 | 0.00033831 | 0.011167   | SAC3/GANP family protein                                            |
| TGGT1_217182-t26.1 | 1956.384837          | 3513.354665        | -0.84466 | 1.09E-07   | 1.38E-05   | RNA-dependent RNA polymerase RDP                                    |
| TGGT1_293840-t26.1 | 1178.789511          | 6638.524076        | -0.83603 | 1.70E-08   | 2.60E-06   | hypothetical protein                                                |
| TGGT1_217700-t26.1 | 767.7326534          | 1366.876508        | -0.83221 | 2.72E-05   | 0.0015282  | AP2 domain transcription factor AP2XII-2                            |
| TGGT1_219240-t26.1 | 220.8154468          | 392.52318          | -0.82997 | 0.00057851 | 0.017359   | poly(U)-RNA hydrolase PTH2 domain-containing protein                |
| TGGT1_244180-t26.1 | 159.2297348          | 282.217899         | -0.82597 | 0.0012472  | 0.030112   | microneme-like protein                                              |
| TGGT1_295080-t26.1 | 195.8983542          | 344.7201515        | -0.81532 | 0.0015627  | 0.03523    | hypothetical protein                                                |
| TGGT1_261070-t26.1 | 949.8769038          | 1663.096291        | -0.80806 | 1.34E-05   | 0.00086921 | apicoplast triosephosphate translocator APT1                        |
| TGGT1_320110-t26.1 | 61.8035814           | 1193.500533        | -0.78676 | 5.88E-06   | 0.00044526 | proliferating cell nuclear antigen PCNA2                            |
| TGGT1_309265-t26.1 | 547.033938           | 940.2198379        | -0.78137 | 1.86E-05   | 0.011594   | oxodoreductase, short chain dehydrogenase/reductase family protein  |
| TGGT1_203930-t26.1 | 1690.077297          | 2896.325296        | -0.77713 | 0.0001392  | 0.001574   | hypothetical protein                                                |
| TGGT1_201670-t26.1 | 361.2504927          | 618.9991365        | -0.76794 | 5.24E-05   | 0.0020402  | DnaJ domain-containing protein                                      |
| TGGT1_255310-t26.1 | 723.9059978          | 1235.76955         | -0.77154 | 1.63E-06   | 0.00014525 | zinc finger (CCH type) motif-containing protein                     |
| TGGT1_272290-t26.1 | 880.960351           | 1502.017375        | -0.76975 | 7.33E-06   | 0.00054011 | pyruvate dehydrogenase complex subunit PDH-E1Beta                   |
| TGGT1_309160-t26.1 | 464.83037            | 791.5297028        | -0.76794 | 0.0017841  | 0.039242   | lga-specific metalloendopeptidase                                   |
| TGGT1_215000-t26.1 | 1959.893073          | 3336.181089        | -0.76742 | 6.01E-07   | 6.02E-05   | putative eukaryotic initiation factor-3                             |
| TGGT1_224800-t26.1 | 204.6830388          | 348.1228436        | -0.7652  | 0.0013088  | 0.031065   | ER lumen protein retaining receptor                                 |
| TGGT1_409990-t26.1 | 1009.180514          | 1705.81634         | -0.75728 | 9.65E-06   | 0.00057587 | hypothetical protein                                                |
| TGGT1_202030-t26.1 | 744.0792104          | 1253.895479        | -0.75289 | 3.90E-06   | 0.00031851 | poly(ADP-ribose) polymerase catalytic domain protein                |
| TGGT1_266320-t26.1 | 821.9431373          | 1371.246551        | -0.73838 | 0.0018051  | 0.039396   | glycosyltransferase family protein                                  |
| TGGT1_232390-t26.1 | 216.4558923          | 358.3659878        | -0.72736 | 0.0024488  | 0.047189   | 18S rRNA biogenesis protein RCL1 protein                            |
| TGGT1_245670-t26.1 | 1086.336439          | 1793.879537        | -0.72361 | 1.18E-05   | 0.00077892 | pyruvate dehydrogenase complex subunit PDH-E1Alpha                  |
| TGGT1_253880-t26.1 | 998.078375           | 1664.335359        | -0.72038 | 2.54E-05   | 0.001436   | GMS1/2 family protein                                               |
| TGGT1_254900-t26.1 | 757.0526368          | 1242.12822         | -0.71435 | 6.47E-05   | 0.00039095 | proteasome subunit beta type 2                                      |
| TGGT1_263470-t26.1 | 351.4399749          | 576.5116098        | -0.71407 | 0.00074958 | 0.020865   | ubiquitin carboxyl-terminal hydrolase UCHL3                         |
| TGGT1_239010-t26.1 | 947.9008157          | 1547.67992         | -0.7073  | 4.70E-05   | 0.0023957  | hypothetical protein                                                |
| TGGT1_315620-t26.1 | 734.6683762          | 610.604397         | -0.70462 | 0.00067868 | 0.019663   | putative vacuolar ATP synthase subunit C                            |
| TGGT1_210420-t26.1 | 616.6254631          | 1001.810339        | -0.70014 | 0.0003217  | 0.010726   | hypothetical protein                                                |
| TGGT1_239530-t26.1 | 920.2075761          | 1491.389018        | -0.69663 | 0.0015348  | 0.039207   | alanine-glyoxylate aminotransferase                                 |
| TGGT1_247450-t26.1 | 1953.714491          | 3350.273732        | -0.69293 | 2.01E-06   | 0.00014921 | proliferating cell nuclear antigen PCNA1                            |
| TGGT1_273370-t26.1 | 713.6269703          | 1153.16296         | -0.69235 | 0.00013498 | 0.0054356  | putative coatomer gamma 2-subunit protein                           |
| TGGT1_222270-t26.1 | 610.0058598          | 985.0331865        | -0.69135 | 9.83E-05   | 0.0042812  | hypothetical protein                                                |
| TGGT1_313080-t26.1 | 1474.069298          | 2370.626925        | -0.68546 | 2.31E-05   | 0.0013567  | hypothetical protein                                                |
| TGGT1_217750-t26.1 | 592.8637832          | 951.3391416        | -0.68226 | 0.00010718 | 0.0045565  | hypothetical protein                                                |
| TGGT1_203370-t26.1 | 951.0247262          | 1515.111295        | -0.67187 | 5.47E-05   | 0.0027027  | hypothetical protein                                                |
| TGGT1_232880-t26.1 | 614.6562471          | 978.5948181        | -0.67193 | 0.0003981  | 0.012851   | hypothetical protein                                                |
| TGGT1_287230-t26.1 | 153.1333464          | 500.0360158        | -0.66607 | 0.00096215 | 0.025105   | inorganic anion transporter, sulfate permease (SuIP) family protein |
| TGGT1_232520-t26.1 | 449.8018253          | 713.1846958        | -0.66499 | 0.00029278 | 0.0098792  | brk domain-containing protein                                       |
| TGGT1_319720-t26.1 | 298.9415168          | 473.8039448        | -0.66443 | 0.0018689  | 0.039854   | hypothetical protein                                                |
| TGGT1_266300-t26.1 | 1290.246181          | 2044.720573        | -0.66426 | 2.34E-05   | 0.0013663  | hypothetical protein                                                |
| TGGT1_228190-t26.1 | 1413.432689          | 2236.103793        | -0.66378 | 6.08E-05   | 0.002952   | putative eukaryotic initiation factor-3                             |
| TGGT1_294640-t26.1 | 3735.567949          | 5907.676803        | -0.66083 | 9.95E-06   | 0.00066499 | ribonucleoside-diphosphate reductase large chain                    |
| TGGT1_288900-t26.1 | 542.6157838          | 857.083495         | -0.65945 | 0.00059227 | 0.017584   | emp24/gp25/gp24 family protein                                      |
| TGGT1_258800-t26.1 | 322.5490895          | 509.1186728        | -0.65848 | 0.00087863 | 0.023436   | ROP31                                                               |
| TGGT1_301480-t26.1 | 221.8903932          | 350.0672392        | -0.65778 | 0.0022916  | 0.045303   | hypothetical protein                                                |
| TGGT1_280600-t26.1 | 80.1644178           | 1260.569227        | -0.65571 | 0.00017235 | 0.0064645  | hypothetical protein                                                |
| TGGT1_411270-t26.1 | 413.3714974          | 650.8453542        | -0.65488 | 0.0012069  | 0.029778   | hypothetical protein                                                |
| TGGT1_218890-t26.1 | 657.3957289          | 1031.208363        | -0.64975 | 0.00046568 | 0.014599   | putative beta-ketoadipyl-acyl carrier protein synthase III          |
| TGGT1_214770-t26.1 | 752.0746194          | 1178.510237        | -0.64802 | 0.00015668 | 0.0060388  | putative small GTP binding protein rab3a                            |
| TGGT1_228290-t26.1 | 1713.486093          | 2678.666304        | -0.64548 | 3.96E-05   | 0.0020685  | phospholipase/carboxylesterase                                      |
| TGGT1_283710-t26.1 | 1112.609721          | 1737.456999        | -0.64303 | 0.0017622  | 0.03886    | longevity-assurance protein (LAG1) domain-containing protein        |
| TGGT1_217740-t26.1 | 1646.807973          | 2571.118705        | -0.64272 | 3.77E-05   | 0.0020034  | 3-ketoacyl-acyl-carrier-protein reductase                           |
| TGGT1_224880-t26.1 | 1261.70818           | 1968.355029        | -0.64161 | 0.0017517  | 0.038806   | kinasin motor domain-containing protein                             |
| TGGT1_262090-t26.1 | 371.304861           | 579.0381424        | -0.64106 | 0.0017044  | 0.038765   | hypothetical protein                                                |
| TGGT1_238040-t26.1 | 537.275775           | 836.5265436        | -0.6398  | 0.0005863  | 0.016279   | protein disulfide-isomerase domain-containing protein               |
| TGGT1_218760-t26.1 | 498.8628472          | 775.5585748        | -0.63659 | 0.0010767  | 0.027413   | putative SNAP protein                                               |
| TGGT1_312530-t26.1 | 766.51319            | 1189.213047        | -0.63362 | 0.00028048 | 0.0096189  | splicing factor, CC1 family protein                                 |
| TGGT1_310240-t26.1 | 928.0569511          | 1438.928663        | -0.63271 | 0.00024158 | 0.0058419  | hypothetical protein                                                |
| TGGT1_299210-t26.1 | 1649.778977          | 2550.396639        | -0.62845 | 9.60E-05   | 0.0041991  | CTP synthase                                                        |
| TGGT1_240280-t26.1 | 1099.145027          | 1687.129659        | -0.62609 | 8.80E-05   | 0.0038697  | SI/Pi/nuclease                                                      |
| TGGT1_306030-t26.1 | 2259.81748           | 3484.481463        | -0.62475 | 4.67E-05   | 0.0023198  | protein disulfide-isomerase                                         |
| TGGT1_218362-t26.1 | 701.5470953          | 1081.005072        | -0.62376 | 0.00038526 | 0.012156   | zinc finger protein, ZFP1                                           |
| TGGT1_249480-t26.1 | 1086.643452          | 1674.258236        | -0.62364 | 0.00014948 | 0.0058144  | tetratricopeptide repeat-containing protein                         |
| TGGT1_201700-t26.1 | 1002.39426           | 1540.502274        | -0.61995 | 0.00050718 | 0.01544    | WD domain, G-beta repeat-containing protein                         |
| TGGT1_314750-t26.1 | 488.7825419          | 746.554498         | -0.61994 | 0.00082666 | 0.022262   | ribosomal L1p/L10e family protein                                   |
| TGGT1_279420-t26.1 | 235.995739           | 3574.499092        | -0.61307 | 5.00E-05   | 0.0025317  | precursor of Tsp1 domain TSP12                                      |
| TGGT1_232520-t26.1 | 1160.251621          | 1772.893263        | -0.61145 | 0.00047754 | 0.01408    | emp24/gp25/gp24 family protein                                      |
| TGGT1_224850-t26.1 | 4463.342385          | 6819.156697        | -0.61147 | 2.19E-05   | 0.0012952  | polyadenylate binding protein                                       |
| TGGT1_300285-t26.1 | 375.3768956          | 573.2794082        | -0.6109  | 0.0018052  | 0.039396   | hypothetical protein                                                |
| TGGT1_308050-t26.1 | 440.3051932          | 672.3653411        | -0.61074 | 0.0024826  | 0.047732   | thioredoxin domain-containing protein                               |
| TGGT1_253730-t26.1 | 1197.148745          | 1827.004397        | -0.60988 | 0.0001354  | 0.0054356  | importin-beta N-terminal domain-containing protein                  |
| TGGT1_229200-t26.1 | 460.4955863          | 702.4468272        | -0.60924 | 0.0023248  | 0.045532   | carboxy-terminal domain cyclin                                      |
| TGGT1_270550-t26.1 | 510.5714277          | 778.8738631        | -0.6089  | 0.0005889  | 0.032723   | gamma-glutamyl phosphate reductase                                  |
| TGGT1_290660-t26.1 | 3622.182121          | 5605.964488        | -0.60414 | 0.00012114 | 0.0047219  | RNA recognition motif-containing protein                            |
| TGGT1_263260-t26.1 | 2184.075675          | 3308.285693        | -0.59906 | 2.75E-05   | 0.0015282  | transporter, major facilitator family protein                       |
| TGGT1_209140-t26.1 | 572.9305802          | 867.0417333        | -0.59774 | 0.0013144  | 0.031109   | anti-silencing protein, ASF1 family protein                         |
| TGGT1_247470-t26.1 | 1391.803583          | 2090.525553        | -0.58691 | 0.00012306 | 0.0051186  | putative nucleolar protein                                          |
| TGGT1_235920-t26.1 | 1269.602741          | 1904.163013        | -0.58478 | 0.0001365  | 0.0054356  | dynein, axonemal, heavy chain 2 family protein                      |
| TGGT1_210960-t26.1 | 519.1456549          | 776.5679563        | -0.58101 | 0.0012001  | 0.029745   | putative replication factor C subunit 2                             |
| TGGT1_218200-t26.1 | 1526.068838          | 2281.988504        | -0.58041 | 0.00017086 | 0.0064375  | Proteasome P1 domain-containing protein                             |
| TGGT1_269650-t26.1 |                      |                    |          |            |            |                                                                     |

|                    |             |              |          |            |          |                                                                          |
|--------------------|-------------|--------------|----------|------------|----------|--------------------------------------------------------------------------|
| TGGT1_269980-t26_1 | 4566.659402 | 6508.400146  | -0.51116 | 0.00059695 | 0.01766  | putative preprotein translocase Sec61                                    |
| TGGT1_275610-t26_1 | 2387.34974  | 3394.214085  | -0.50767 | 0.0015388  | 0.035027 | protein kinase                                                           |
| TGGT1_256000-t26_1 | 1468.523641 | 2087.611642  | -0.50749 | 0.0010485  | 0.026776 | ER retention receptor ERD2                                               |
| TGGT1_29180-t26_1  | 1968.036234 | 2792.63733   | -0.50487 | 0.0010237  | 0.028224 | HEAT repeat-containing protein                                           |
| TGGT1_206610-t26_1 | 1614.841282 | 2386.272864  | -0.50161 | 0.0015576  | 0.03523  | pyruvate dehydrogenase complex subunit PDH-E2                            |
| TGGT1_310750-t26_1 | 2357.76408  | 3331.157174  | -0.4986  | 0.0012396  | 0.030112 | emp24/gp25L/gp24 family protein                                          |
| TGGT1_288920-t26_1 | 2134.928594 | 3016.120344  | -0.49851 | 0.0012469  | 0.030112 | phosphonate-transporting ATPase                                          |
| TGGT1_262380-t26_1 | 1127.139348 | 1589.204414  | -0.49564 | 0.0018677  | 0.039854 | putative elongation factor Tu                                            |
| TGGT1_257550-t26_1 | 1752.865091 | 2460.813643  | -0.48942 | 0.0017938  | 0.039352 | hypothetical protein                                                     |
| TGGT1_203600-t26_1 | 1464.754779 | 2048.902856  | -0.48419 | 0.0022981  | 0.045325 | hypothetical protein                                                     |
| TGGT1_254820-t26_1 | 1324.718803 | 1850.652221  | -0.48235 | 0.0023918  | 0.046518 | hypothetical protein                                                     |
| TGGT1_243920-t26_1 | 2316.187883 | 3226.773242  | -0.47834 | 0.0012121  | 0.029778 | putative DNA replication licensing factor MCM5                           |
| TGGT1_214970-t26_1 | 4346.055993 | 6049.141373  | -0.47702 | 0.0011121  | 0.027975 | putative DNA replication licensing factor MCM2                           |
| TGGT1_270510-t26_1 | 6619.576552 | 9195.966194  | -0.47426 | 0.00077432 | 0.021401 | asparaginyl-tRNA synthetase                                              |
| TGGT1_363030-t26_1 | 13361.94874 | 18530.50723  | -0.47177 | 0.00066371 | 0.019363 | rhostry protein                                                          |
| TGGT1_273460-t26_1 | 3643.800895 | 5049.942245  | -0.47082 | 0.00080917 | 0.022074 | eukaryotic translation initiation factor 3 subunit 6 interacting protein |
| TGGT1_243200-t26_1 | 6124.62741  | 8480.15355   | -0.46947 | 0.0023144  | 0.045433 | hypothetical protein                                                     |
| TGGT1_218240-t26_1 | 3878.562833 | 5349.939708  | -0.464   | 0.0025364  | 0.048543 | hypothetical protein                                                     |
| TGGT1_213570-t26_1 | 2179.030654 | 2996.12985   | -0.45941 | 0.0010934  | 0.027746 | hypothetical protein                                                     |
| TGGT1_411430-t26_1 | 3125.001252 | 4290.479996  | -0.45728 | 0.0022568  | 0.045146 | ROP5                                                                     |
| TGGT1_251690-t26_1 | 3025.946861 | 4148.675075  | -0.45526 | 0.0014172  | 0.033076 | putative seryl-tRNA synthetase                                           |
| TGGT1_314400-t26_1 | 2123.387669 | 2886.432828  | -0.44292 | 0.0021828  | 0.044087 | putative pyruvate dehydrogenase E1 component                             |
| TGGT1_296960-t26_1 | 9838.558483 | 13352.704777 | -0.44061 | 0.0018425  | 0.039787 | phosphofructokinase PFKII                                                |
| TGGT1_318310-t26_1 | 1879.042679 | 2549.543125  | -0.44024 | 0.0019844  | 0.041475 | transketolase                                                            |
| TGGT1_311240-t26_1 | 3819.110786 | 5143.509539  | -0.42952 | 0.002413   | 0.046821 | putative DnaI family chaperone                                           |
| TGGT1_225050-t26_1 | 4222.05482  | 5661.093664  | -0.42314 | 0.0021116  | 0.043217 | putative adenosylhomocysteinase                                          |
| TGGT1_261950-t26_1 | 5913.201426 | 7794.848041  | -0.39858 | 0.0022382  | 0.045097 | ATP synthase beta subunit ATP-B                                          |
| TGGT1_290200-t26_1 | 5634.519024 | 7396.337087  | -0.39252 | 0.0022736  | 0.045267 | NAD/NADP octopine/nopaline dehydrogenase                                 |
| TGGT1_240210-t26_1 | 0           | 743.3530468  | #NAME?   | 3.27E-45   | 3.05E-42 | putative phosphate transporter family protein                            |

SS Table: ToxoDB  
KOPITvsPar\_DEG\_down sort

ran
